# Supplementary material for: Competitive Exclusion Bacterial Culture Derived from the Gut Microbiome of Nile Tilapia (Oreochromis niloticus) as a Resource to Efficiently Recover Probiotic Strains: Taxonomic, Genomic, and Functional Proof of Concept
Source: MDPI journal article supplement (doi:10.3390/microorganisms10071376), 2022-07-08
Supplement: s1 [file s1]

Table S1. Evaluation of the quality of contigs assembled and selection of contigs. Green: Good quality; Yellow: Accepted quality; Red: Low quality. A12 (*Lactococcus lactis*), M4 (*Priestia megaterium*), and M10 (*Priestia* sp.).

| Assembly                   | A12     |         |         |         | M4      |         |         |         | M10     |         |         |         |
|----------------------------|---------|---------|---------|---------|---------|---------|---------|---------|---------|---------|---------|---------|
|                            | Megahit | Skesa   | SPAdes  | Velvet  | Megahit | Skesa   | SPAdes  | Velvet  | Megahit | Skesa   | SPAdes  | Velvet  |
| # contigs (>= 0 bp)        | 398     | 92      | 91      | 337     | 1434    | 35      | 113     | 99      | 917     | 233     | 223     | 600     |
| # contigs (>= 1000 bp)     | 56      | 90      | 48      | 251     | 52      | 28      | 25      | 32      | 173     | 219     | 103     | 390     |
| # contigs (>= 5000 bp)     | 49      | 76      | 40      | 141     | 38      | 26      | 22      | 26      | 122     | 160     | 80      | 259     |
| # contigs (>= 10000 bp)    | 39      | 61      | 36      | 79      | 34      | 24      | 20      | 23      | 96      | 125     | 69      | 164     |
| # contigs (>= 25000 bp)    | 27      | 33      | 24      | 13      | 27      | 18      | 15      | 15      | 62      | 70      | 52      | 48      |
| # contigs (>= 50000 bp)    | 14      | 16      | 13      | 0       | 17      | 12      | 10      | 9       | 37      | 34      | 35      | 15      |
| Total length (>= 0 bp)     | 2542862 | 2480332 | 2498175 | 2252069 | 5561628 | 5305314 | 5334434 | 5343335 | 5556060 | 5434184 | 5479164 | 5259384 |
| Total length (>= 1000 bp)  | 2484170 | 2479026 | 2488968 | 2217713 | 5317556 | 5300305 | 5313866 | 5328885 | 5436184 | 5424437 | 5452008 | 5191346 |
| Total length (>= 5000 bp)  | 2463339 | 2446008 | 2469755 | 1913935 | 5293441 | 5296710 | 5309462 | 5319369 | 5305734 | 5262652 | 5391239 | 4832767 |
| Total length (>= 10000 bp) | 2389672 | 2343042 | 2440272 | 1456989 | 5261795 | 5278901 | 5291447 | 5293857 | 5122501 | 5008229 | 5312368 | 4132922 |
| Total length (>= 25000 bp) | 2204730 | 1878060 | 2272251 | 439835  | 5153898 | 5163413 | 5190458 | 5153675 | 4582868 | 4114158 | 5052872 | 2306701 |
| Total length (>= 50000 bp) | 1747674 | 1245119 | 1863988 | 0       | 4779934 | 4915095 | 4971232 | 4916142 | 3611402 | 2877816 | 4430674 | 1185016 |
| # contigs                  | 61      | 91      | 49      | 278     | 75      | 35      | 29      | 35      | 190     | 231     | 110     | 434     |
| Largest contig             | 202730  | 138855  | 262694  | 47193   | 730183  | 1223276 | 2950775 | 2950484 | 377114  | 260389  | 441034  | 167341  |
| Total length               | 2488200 | 2479969 | 2489652 | 2237376 | 5332033 | 5305314 | 5316929 | 5330689 | 5448399 | 5433377 | 5456842 | 5222642 |
| GC (%)                     | 34.85   | 34.89   | 34.85   | 35.38   | 37.92   | 37.91   | 37.94   | 37.9    | 37.71   | 37.75   | 37.72   | 37.99   |
| N50                        | 110147  | 53452   | 159385  | 13767   | 378794  | 824746  | 2950775 | 2950484 | 73030   | 52374   | 132222  | 21152   |
| N90                        | 20843   | 13794   | 30377   | 4010    | 49545   | 59281   | 59505   | 59423   | 15102   | 11660   | 30774   | 5991    |
| L50                        | 8       | 16      | 6       | 51      | 6       | 3       | 1       | 1       | 23      | 31      | 13      | 62      |
| L90                        | 29      | 52      | 23      | 164     | 18      | 10      | 7       | 7       | 79      | 115     | 48      | 236     |
| # N's per 100 kbp          | 0       | 0       | 0       | 116.3   | 0       | 0       | 0       | 32.92   | 0       | 0       | 0       | 21.75   |

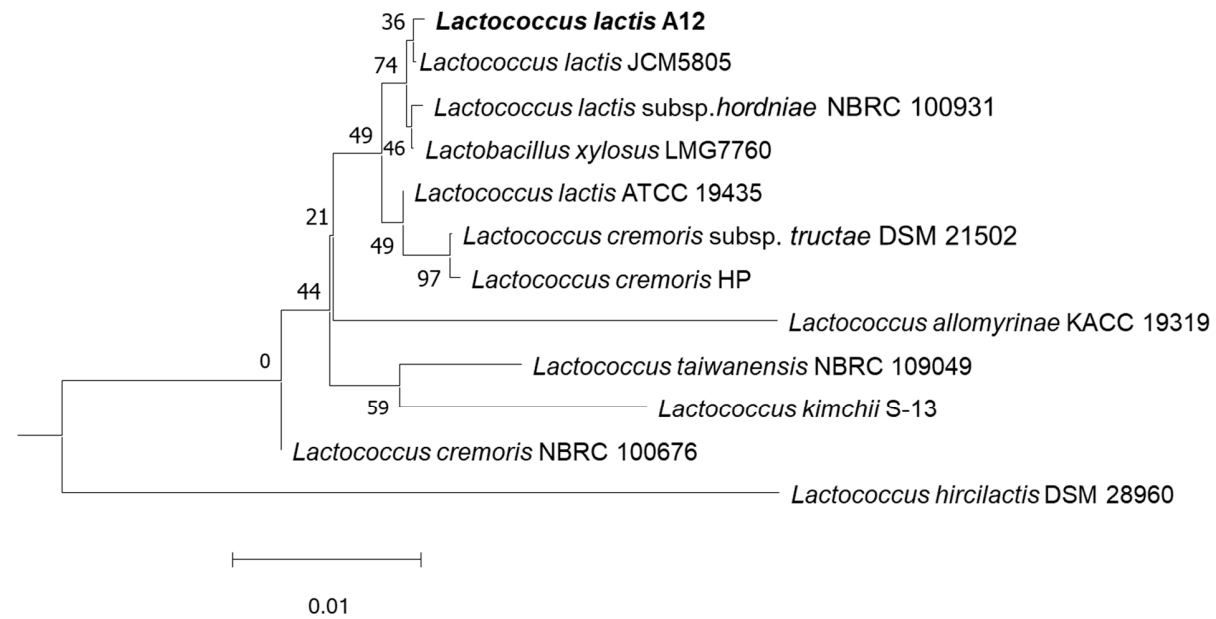

(a)

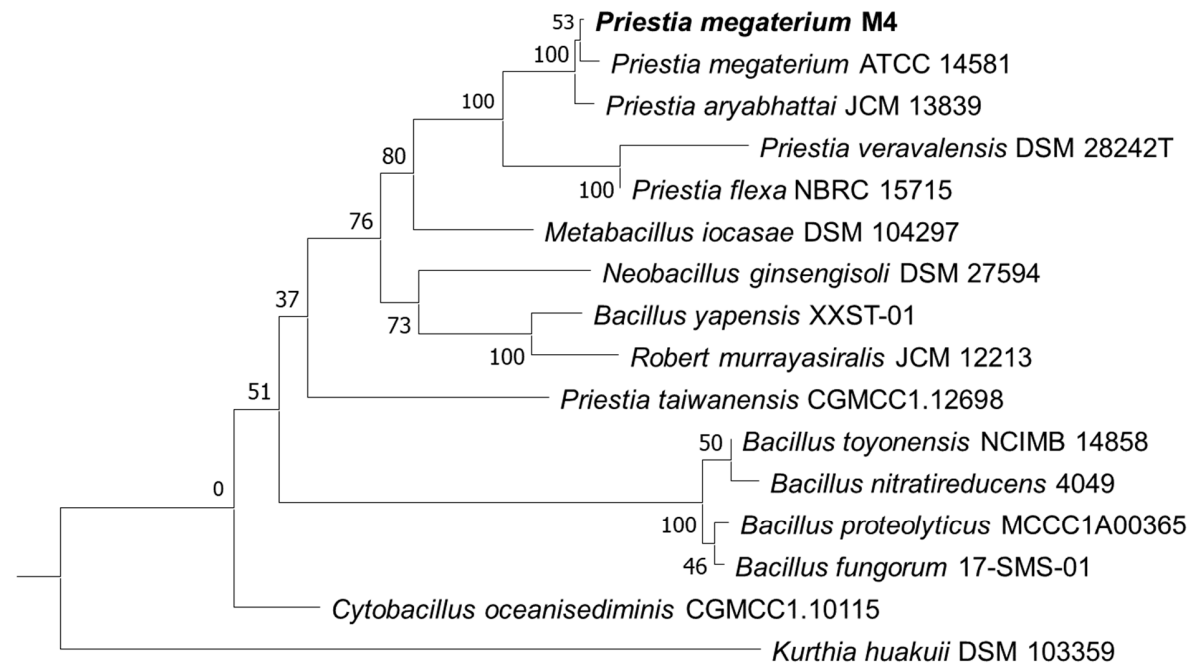

(b)

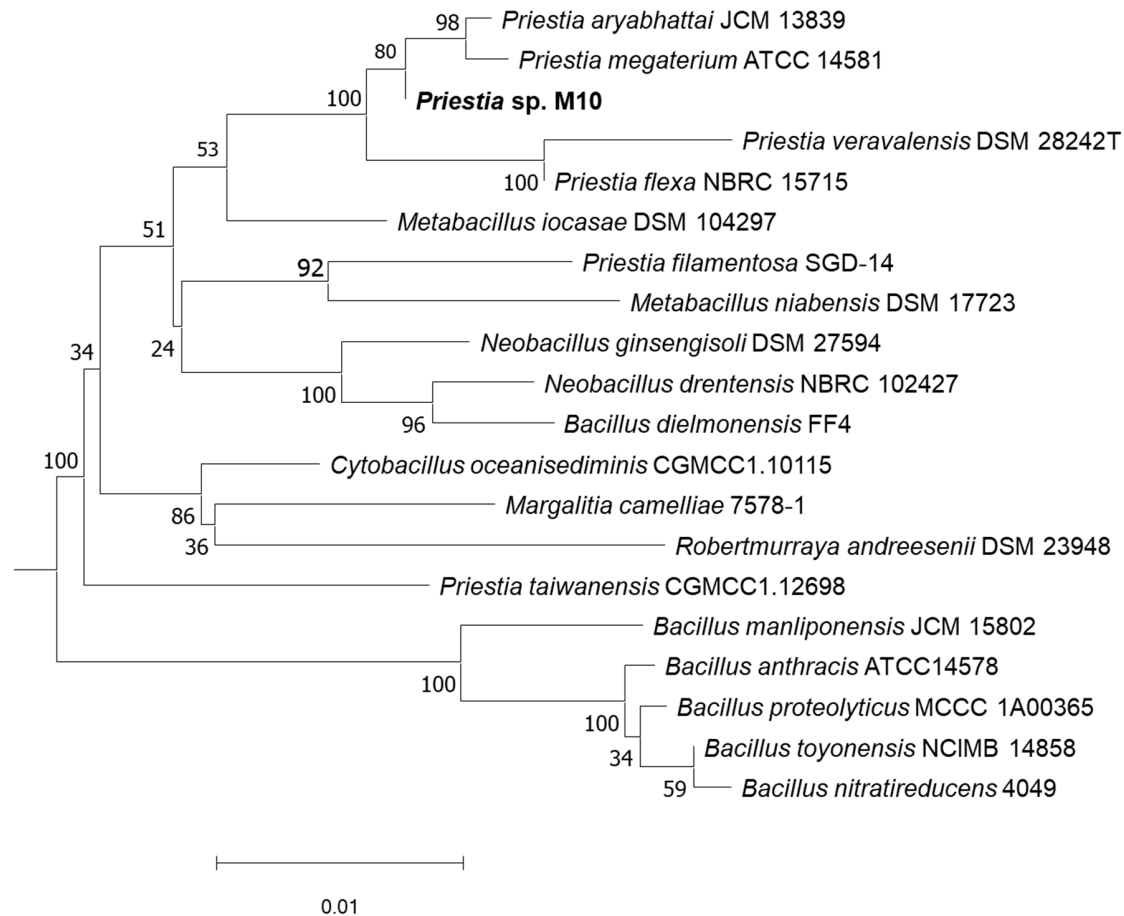

(c)

Figure S1. Tree inferred with FastME 2.1.6.1 from GBDP distances were calculated from 16S rDNA gene sequences for *Lactococcus lactis* A12 (a), *Priestia megaterium* M4 (b), and *Priestia* sp. M10 (c). The branch lengths were scaled in terms of GBDP distance formula d5. The numbers above branches were GBDP pseudo-bootstrap support values > 60 % from 100 replications, with an average branch support of 52.8 %, 74.3 %, and 73.1 % for A12, M4, and M10, respectively. The tree was rooted at the midpoint.

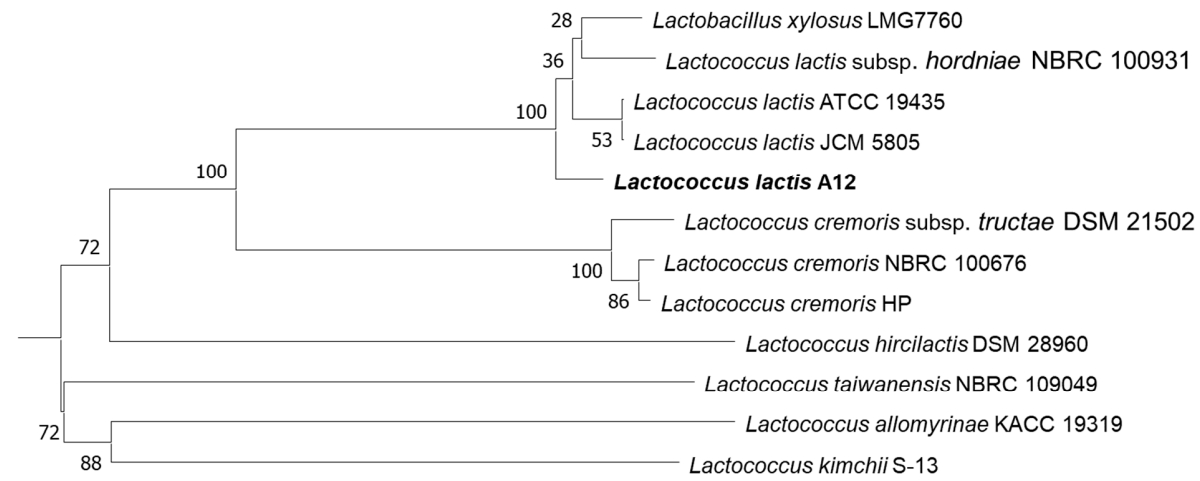

(a)

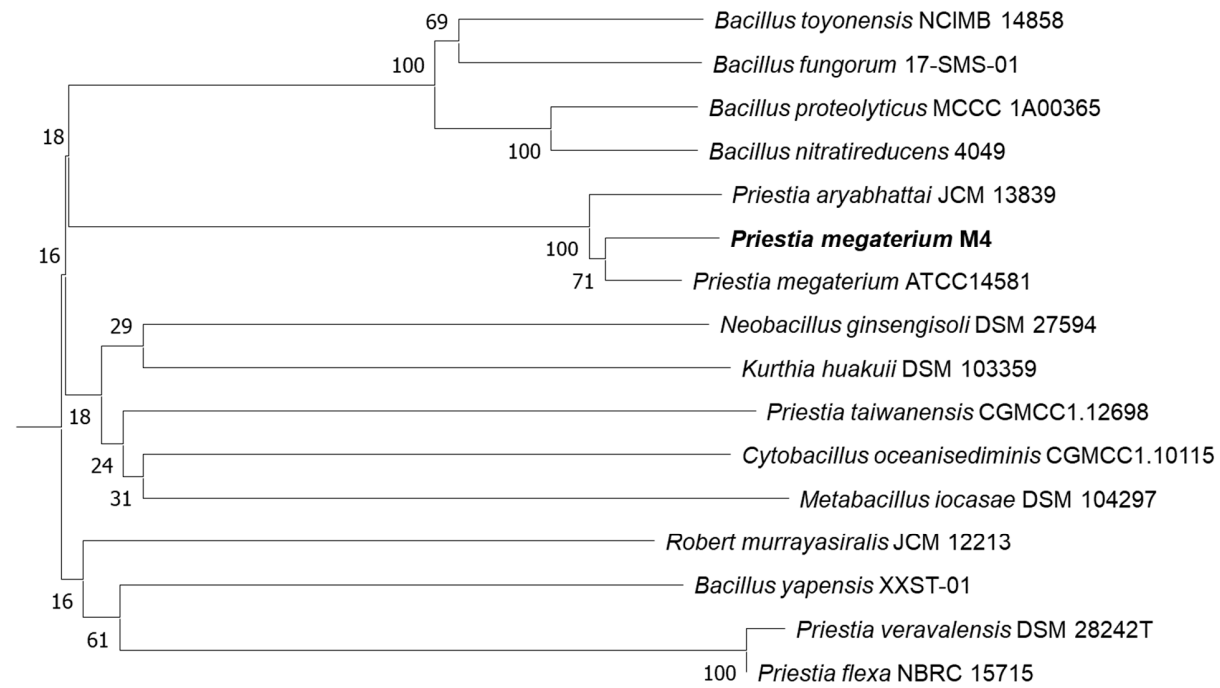

(b)

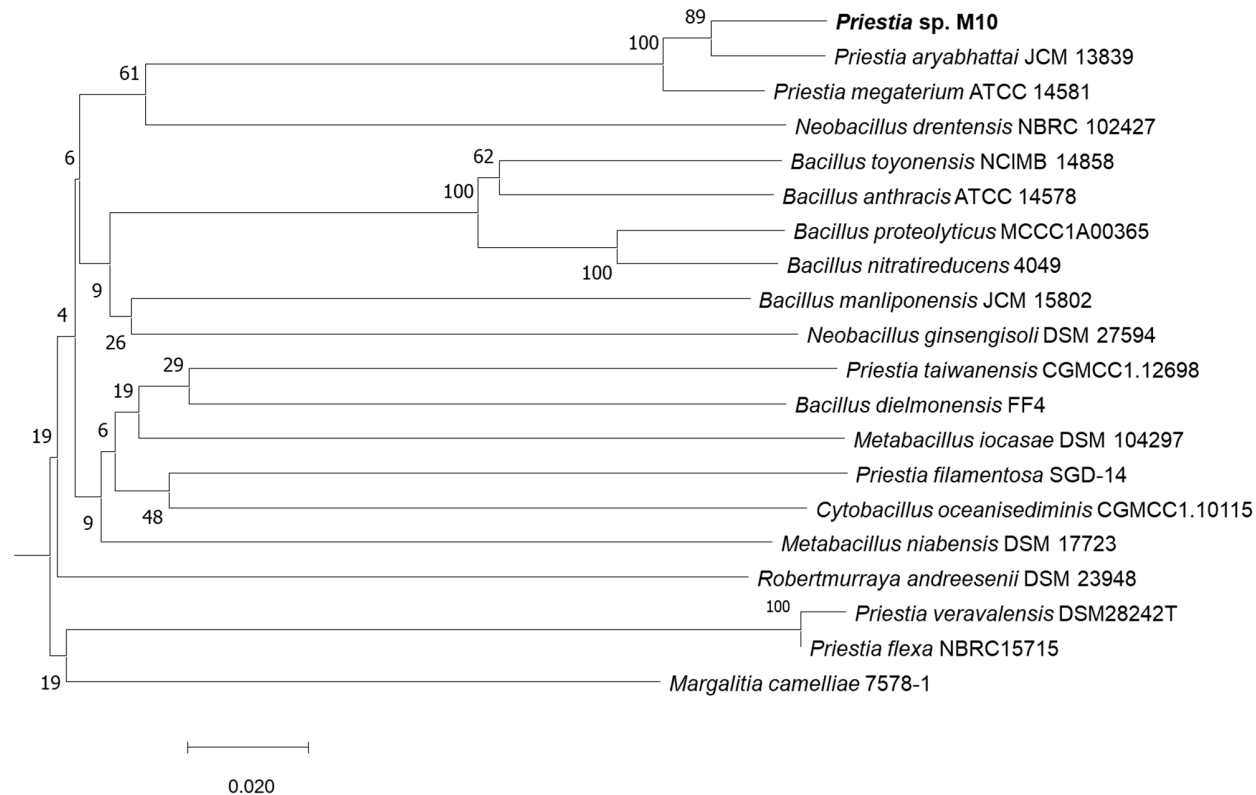

(c)

Figure S2. Tree inferred with FastME 2.1.6.1 from GBDP distances calculated from genome sequences for *Lactococcus lactis* A12 (a), *Priestia megaterium* M4 (b), and *Priestia* sp. M10 (c). The branch lengths are scaled in terms of GBDP distance formula d5. The numbers above branches are GBDP pseudo-bootstrap support values > 60 % from 100 replications, with an average branch support of 73.7 %, 56.7 %, and 46.3 %, for A12, M4, and M10, respectively. The tree was rooted at the midpoint.

Table S2. Genes related to amino acid synthesis, vitamin synthesis, carbohydrate metabolism, and adhesion identified in *Lactococcus lactis* A12.

| Amino acid biosynthesis |         |         |             |                                                                                                       |                                                             |
|-------------------------|---------|---------|-------------|-------------------------------------------------------------------------------------------------------|-------------------------------------------------------------|
| Scaffold                | Start   | Stop    | Length (nt) | Function                                                                                              | Subsystems                                                  |
| 1                       | 391674  | 393266  | 1593        | Asparagine synthetase [glutamine-hydrolyzing] (EC 6.3.5.4)                                            | Glutamine, Glutamate, Aspartate and Asparagine Biosynthesis |
| 1                       | 749473  | 748505  | 969         | L-asparaginase (EC 3.5.1.1)                                                                           |                                                             |
| 1                       | 1357512 | 1356697 | 816         | Glutamate racemase (EC 5.1.1.3)                                                                       |                                                             |
| 1                       | 1360872 | 1359433 | 1440        | Glutamate synthase [NADPH] small chain (EC 1.4.1.13)                                                  |                                                             |
| 1                       | 1365332 | 1360872 | 4461        | Glutamate synthase [NADPH] large chain (EC 1.4.1.13)                                                  |                                                             |
| 1                       | 1414936 | 1416348 | 1413        | Transcriptional regulator, GntR family domain / Aspartate aminotransferase (EC 2.6.1.1)               |                                                             |
| 1                       | 2009379 | 2008198 | 1182        | Aspartate aminotransferase (EC 2.6.1.1)                                                               |                                                             |
| 1                       | 2362363 | 2361023 | 1341        | Glutamine synthetase type I (EC 6.3.1.2)                                                              |                                                             |
| 1                       | 2380997 | 2380275 | 723         | Aspartate racemase (EC 5.1.1.13)                                                                      |                                                             |
| 1                       | 2384144 | 2382267 | 1878        | Asparagine synthetase [glutamine-hydrolyzing] (EC 6.3.5.4)<br>AsnB                                    |                                                             |
| 1                       | 1210888 | 1211970 | 1083        | Histidinol-phosphate aminotransferase (EC 2.6.1.9)                                                    | Histidine Biosynthesis                                      |
| 1                       | 1211958 | 1212944 | 987         | ATP phosphoribosyltransferase regulatory subunit (EC 2.4.2.17)                                        |                                                             |
| 1                       | 1213547 | 1214839 | 1293        | Histidinol dehydrogenase (EC 1.1.1.23)                                                                |                                                             |
| 1                       | 1215580 | 1216185 | 606         | Imidazoleglycerol-phosphate dehydratase (EC 4.2.1.19)                                                 |                                                             |
| 1                       | 1216789 | 1217508 | 720         | Phosphoribosylformimino-5-aminoimidazole carboxamide ribotide isomerase (EC 5.3.1.16)                 |                                                             |
| 1                       | 1218274 | 1218912 | 639         | Phosphoribosyl-AMP cyclohydrolase (EC 3.5.4.19) /<br>Phosphoribosyl-ATP pyrophosphatase (EC 3.6.1.31) |                                                             |



|   |         |         |      |                                                                                                   |                                       |
|---|---------|---------|------|---------------------------------------------------------------------------------------------------|---------------------------------------|
| 1 | 1218913 | 1219722 | 810  | Histidinol-phosphatase (EC 3.1.3.15)                                                              |                                       |
| 1 | 65621   | 64341   | 1281 | O-acetylhomoserine sulfhydrylase (EC 2.5.1.49) @ O-succinylhomoserine sulfhydrylase (EC 2.5.1.48) | Methionine Biosynthesis,              |
| 1 | 248952  | 248476  | 477  | S-ribosylhomocysteine lyase (EC 4.4.1.21) @ Autoinducer-2 production protein LuxS                 |                                       |
| 1 | 269251  | 268319  | 933  | Cysteine synthase (EC 2.5.1.47)                                                                   |                                       |
| 1 | 353092  | 353952  | 861  | Methionine ABC transporter substrate-binding protein                                              |                                       |
| 1 | 354096  | 354956  | 861  | Methionine ABC transporter substrate-binding protein                                              |                                       |
| 1 | 355074  | 355934  | 861  | Methionine ABC transporter substrate-binding protein                                              |                                       |
| 1 | 355995  | 356813  | 819  | Methionine ABC transporter substrate-binding protein                                              |                                       |
| 1 | 356917  | 358023  | 1107 | Methionine ABC transporter ATP-binding protein                                                    |                                       |
| 1 | 358023  | 358718  | 696  | Methionine ABC transporter permease protein                                                       |                                       |
| 1 | 358766  | 359314  | 549  | Substrate-specific component MtsA of methionine-regulated ECF transporter                         |                                       |
| 1 | 359423  | 361120  | 1698 | Duplicated ATPase component MtsB of energizing module of methionine-regulated ECF transporter     |                                       |
| 1 | 361113  | 361934  | 822  | Transmembrane component MtsC of energizing module of methionine-regulated ECF transporter         |                                       |
| 1 | 794907  | 796049  | 1143 | Cystathionine gamma-lyase (EC 4.4.1.1)                                                            |                                       |
| 1 | 796264  | 797184  | 921  | Cysteine synthase (EC 2.5.1.47)                                                                   |                                       |
| 1 | 1151729 | 1153015 | 1287 | Homoserine dehydrogenase (EC 1.1.1.3)                                                             |                                       |
| 1 | 754452  | 753100  | 1353 | Aspartokinase (EC 2.7.2.4)                                                                        | Threonine and Homoserine Biosynthesis |
| 1 | 1151729 | 1153015 | 1287 | Homoserine dehydrogenase (EC 1.1.1.3)                                                             |                                       |
| 1 | 1153020 | 1153910 | 891  | Homoserine kinase (EC 2.7.1.39)                                                                   |                                       |
| 1 | 1414936 | 1416348 | 1413 | Transcriptional regulator, GntR family domain / Aspartate aminotransferase (EC 2.6.1.1)           |                                       |
| 1 | 1739298 | 1738222 | 1077 | Aspartate-semialdehyde dehydrogenase (EC 1.2.1.11)                                                |                                       |

|   |         |         |      |                                                                                                                       |                                         |
|---|---------|---------|------|-----------------------------------------------------------------------------------------------------------------------|-----------------------------------------|
| 1 | 2009379 | 2008198 | 1182 | Aspartate aminotransferase (EC 2.6.1.1)                                                                               |                                         |
| 1 | 2254330 | 2252840 | 1491 | Threonine synthase (EC 4.2.3.1)                                                                                       |                                         |
| 1 | 39158   | 40333   | 1176 | Aromatic amino acid aminotransferase gamma (EC 2.6.1.57) @ N-acetyl-L,L-diaminopimelate aminotransferase (EC 2.6.1.-) | Lysine Biosynthesis DAP Pathway,        |
| 1 | 309794  | 310564  | 771  | 2,3,4,5-tetrahydropyridine-2,6-dicarboxylate N-acetyltransferase (EC 2.3.1.89)                                        |                                         |
| 1 | 310701  | 311855  | 1155 | N-acetyl-L,L-diaminopimelate deacetylase (EC 3.5.1.47)                                                                |                                         |
| 1 | 754452  | 753100  | 1353 | Aspartokinase (EC 2.7.2.4)                                                                                            |                                         |
| 1 | 1359317 | 1358058 | 1260 | Diaminopimelate decarboxylase (EC 4.1.1.20)                                                                           |                                         |
| 1 | 1643924 | 1643142 | 783  | 4-hydroxy-tetrahydrodipicolinate reductase (EC 1.17.1.8)                                                              |                                         |
| 1 | 1737412 | 1736519 | 894  | 4-hydroxy-tetrahydrodipicolinate synthase (EC 4.3.3.7)                                                                |                                         |
| 1 | 1739298 | 1738222 | 1077 | Aspartate-semialdehyde dehydrogenase (EC 1.2.1.11)                                                                    |                                         |
| 1 | 38094   | 36472   | 1623 | Sulfate permease                                                                                                      | Cysteine Biosynthesis                   |
| 1 | 269251  | 268319  | 933  | Cysteine synthase (EC 2.5.1.47)                                                                                       |                                         |
| 1 | 794907  | 796049  | 1143 | Cystathionine gamma-lyase (EC 4.4.1.1)                                                                                |                                         |
| 1 | 796264  | 797184  | 921  | Cysteine synthase (EC 2.5.1.47)                                                                                       |                                         |
| 1 | 2032237 | 2031638 | 600  | Serine acetyltransferase (EC 2.3.1.30)                                                                                |                                         |
| 1 | 1221121 | 1222662 | 1542 | 2-isopropylmalate synthase (EC 2.3.3.13)                                                                              | Branched-Chain Amino Acid Biosynthesis, |
| 1 | 1222674 | 1223711 | 1038 | 3-isopropylmalate dehydrogenase (EC 1.1.1.85)                                                                         |                                         |
| 1 | 1224003 | 1225385 | 1383 | 3-isopropylmalate dehydratase large subunit (EC 4.2.1.33)                                                             |                                         |
| 1 | 1225405 | 1225980 | 576  | 3-isopropylmalate dehydratase small subunit (EC 4.2.1.33)                                                             |                                         |
| 1 | 1226895 | 1228607 | 1713 | Dihydroxy-acid dehydratase (EC 4.2.1.9)                                                                               |                                         |
| 1 | 1228618 | 1230345 | 1728 | Acetolactate synthase large subunit (EC 2.2.1.6)                                                                      |                                         |

|   |         |         |      |                                                           |                       |
|---|---------|---------|------|-----------------------------------------------------------|-----------------------|
| 1 | 1230338 | 1230814 | 477  | Acetolactate synthase small subunit (EC 2.2.1.6)          |                       |
| 1 | 1231938 | 1233188 | 1251 | Threonine dehydratase biosynthetic (EC 4.3.1.19)          |                       |
| 1 | 1367167 | 1366145 | 1023 | Branched-chain amino acid aminotransferase (EC 2.6.1.42)  |                       |
| 1 | 1221121 | 1222662 | 1542 | 2-isopropylmalate synthase (EC 2.3.3.13)                  | Leucine biosynthesis  |
| 1 | 1222674 | 1223711 | 1038 | 3-isopropylmalate dehydrogenase (EC 1.1.1.85)             |                       |
| 1 | 1224003 | 1225385 | 1383 | 3-isopropylmalate dehydratase large subunit (EC 4.2.1.33) |                       |
| 1 | 1225405 | 1225980 | 576  | 3-isopropylmalate dehydratase small subunit (EC 4.2.1.33) |                       |
| 1 | 1367167 | 1366145 | 1023 | Branched-chain amino acid aminotransferase (EC 2.6.1.42)  |                       |
| 1 | 587273  | 588520  | 1248 | Serine hydroxymethyltransferase (EC 2.1.2.1)              | Glycine Biosynthesis, |
| 1 | 860267  | 861370  | 1104 | Alanine racemase (EC 5.1.1.1)                             | Alanine biosynthesis, |
| 1 | 1367167 | 1366145 | 1023 | Branched-chain amino acid aminotransferase (EC 2.6.1.42)  |                       |
| 1 | 2039615 | 2040589 | 975  | Cysteine desulfurase (EC 2.8.1.7)                         |                       |
| 1 | 587273  | 588520  | 1248 | Serine hydroxymethyltransferase (EC 2.1.2.1)              | Serine Biosynthesis   |
| 1 | 589412  | 590509  | 1098 | Phosphoserine aminotransferase (EC 2.6.1.52)              |                       |
| 1 | 590506  | 591702  | 1197 | D-3-phosphoglycerate dehydrogenase (EC 1.1.1.95)          |                       |
| 1 | 591726  | 592376  | 651  | Phosphoserine phosphatase (EC 3.1.3.3)                    |                       |

#### Vitamins Biosynthesis

| Scaffold | Start   | Stop    | Length (nt) | Function                                                                                                                                         | Subsystems           |
|----------|---------|---------|-------------|--------------------------------------------------------------------------------------------------------------------------------------------------|----------------------|
| 1        | 351135  | 350587  | 549         | Substrate-specific component BioY of biotin ECF transporter                                                                                      | Biotin biosynthesis, |
| 1        | 1073737 | 1073087 | 651         | Competence protein F homolog, phosphoribosyltransferase domain; protein YhgH required for utilization of DNA as sole source of carbon and energy |                      |
| 1        | 1652162 | 1651023 | 1140        | 3-ketoacyl-CoA thiolase (EC 2.3.1.16) @ Acetyl-CoA acetyltransferase (EC 2.3.1.9)                                                                |                      |

|   |         |         |      |                                                                                                      |                                             |
|---|---------|---------|------|------------------------------------------------------------------------------------------------------|---------------------------------------------|
| 1 | 1924695 | 1923724 | 972  | Biotin operon repressor / Biotin--protein ligase (EC 6.3.4.9)(EC 6.3.4.10)(EC 6.3.4.11)(EC 6.3.4.15) |                                             |
| 1 | 1925270 | 1924701 | 570  | Substrate-specific component BioY of biotin ECF transporter                                          |                                             |
| 1 | 1925415 | 1926656 | 1242 | Long-chain-fatty-acid--CoA ligase (EC 6.2.1.3)                                                       |                                             |
| 1 | 1926646 | 1927794 | 1149 | 3-ketoacyl-CoA thiolase (EC 2.3.1.16) @ Acetyl-CoA acetyltransferase (EC 2.3.1.9)                    |                                             |
| 1 | 352363  | 351815  | 549  | Substrate-specific component ThiT of thiamin ECF transporter                                         | Thiamin biosynthesis                        |
| 1 | 1338605 | 1337958 | 648  | Thiamin-phosphate pyrophosphorylase (EC 2.5.1.3)                                                     |                                             |
| 1 | 1340164 | 1339412 | 753  | Hydroxyethylthiazole kinase (EC 2.7.1.50)                                                            |                                             |
| 1 | 1547149 | 1545350 | 1800 | 1-deoxy-D-xylulose 5-phosphate synthase (EC 2.2.1.7)                                                 |                                             |
| 1 | 1800764 | 1799022 | 1743 | 1-deoxy-D-xylulose 5-phosphate synthase (EC 2.2.1.7)                                                 |                                             |
| 1 | 2005529 | 2004894 | 636  | Thiamin pyrophosphokinase (EC 2.7.6.2)                                                               |                                             |
| 1 | 738387  | 737275  | 1113 | O-succinylbenzoate synthase (EC 4.2.1.113)                                                           | Menaquinone and Phylloquinone Biosynthesis, |
| 1 | 739739  | 738384  | 1356 | O-succinylbenzoic acid--CoA ligase (EC 6.2.1.26)                                                     |                                             |
| 1 | 741131  | 740289  | 843  | Naphthoate synthase (EC 4.1.3.36)                                                                    |                                             |
| 1 | 742333  | 741518  | 816  | 2-succinyl-6-hydroxy-2,4-cyclohexadiene-1-carboxylate synthase (EC 4.2.99.20)                        |                                             |
| 1 | 744005  | 742323  | 1683 | 2-succinyl-5-enolpyruvyl-6-hydroxy-3-cyclohexene-1-carboxylic-acid synthase (EC 2.2.1.9)             |                                             |
| 1 | 745234  | 744059  | 1176 | Isochorismate synthase (EC 5.4.4.2) @ Menaquinone-specific isochorismate synthase (EC 5.4.4.2)       |                                             |
| 1 | 1788668 | 1789627 | 960  | 1,4-dihydroxy-2-naphthoate polyprenyltransferase (EC 2.5.1.74)                                       |                                             |
| 1 | 550828  | 551841  | 1014 | NAD-dependent glyceraldehyde-3-phosphate dehydrogenase (EC 1.2.1.12)                                 | Pyridoxin (Vitamin B6) Biosynthesis         |
| 1 | 589412  | 590509  | 1098 | Phosphoserine aminotransferase (EC 2.6.1.52)                                                         |                                             |

|   |         |         |      |                                                                                                                              |                             |
|---|---------|---------|------|------------------------------------------------------------------------------------------------------------------------------|-----------------------------|
| 1 | 590506  | 591702  | 1197 | D-3-phosphoglycerate dehydrogenase (EC 1.1.1.95)                                                                             |                             |
| 1 | 1137383 | 1138156 | 774  | Hypothetical NagD-like phosphatase                                                                                           |                             |
| 1 | 1547149 | 1545350 | 1800 | 1-deoxy-D-xylulose 5-phosphate synthase (EC 2.2.1.7)                                                                         |                             |
| 1 | 1800764 | 1799022 | 1743 | 1-deoxy-D-xylulose 5-phosphate synthase (EC 2.2.1.7)                                                                         |                             |
| 1 | 2429896 | 2428886 | 1011 | NAD-dependent glyceraldehyde-3-phosphate dehydrogenase (EC 1.2.1.12)                                                         |                             |
| 1 | 24246   | 25517   | 1272 | tRNA(Ile)-lysidine synthetase (EC 6.3.4.19)                                                                                  | Folate biosynthesis cluster |
| 1 | 25498   | 26049   | 552  | Hypoxanthine-guanine phosphoribosyltransferase (EC 2.4.2.8)                                                                  |                             |
| 1 | 145260  | 145793  | 534  | 5-formyltetrahydrofolate cyclo-ligase (EC 6.3.3.2)                                                                           |                             |
| 1 | 1143812 | 1144318 | 507  | Dihydrofolate reductase (EC 1.5.1.3)                                                                                         |                             |
| 1 | 1146435 | 1146785 | 351  | Dihydroneopterin aldolase (EC 4.1.2.25)                                                                                      |                             |
| 1 | 1146864 | 1147913 | 1050 | 2-amino-4-hydroxy-6-hydroxymethyldihydropteridine pyrophosphokinase (EC 2.7.6.3) / GTP cyclohydrolase I (EC 3.5.4.16) type 1 |                             |
| 1 | 1147910 | 1148983 | 1074 | Dihydropteroate synthase (EC 2.5.1.15)                                                                                       |                             |
| 1 | 1148986 | 1149483 | 498  | Dihydroneopterin triphosphate pyrophosphohydrolase                                                                           |                             |
| 1 | 1149502 | 1150791 | 1290 | Dihydrofolate synthase (EC 6.3.2.12) @ Folylpolyglutamate synthase (EC 6.3.2.17)                                             |                             |
| 1 | 1414225 | 1412339 | 1887 | Para-aminobenzoate synthase, aminase component (EC 2.6.1.85) / Aminodeoxychorismate lyase (EC 4.1.3.38)                      |                             |
| 1 | 1414811 | 1414230 | 582  | Para-aminobenzoate synthase, amidotransferase component (EC 2.6.1.85)                                                        |                             |
| 1 | 1596433 | 1595891 | 543  | Hypoxanthine-guanine phosphoribosyltransferase (EC 2.4.2.8)                                                                  |                             |
| 1 | 1625726 | 1624887 | 840  | Thymidylate synthase (EC 2.1.1.45)                                                                                           |                             |

#### Carbohydrates

| Scaffold | Start | Stop | Length (nt) | Function | Subsystems |
|----------|-------|------|-------------|----------|------------|
|----------|-------|------|-------------|----------|------------|

|   |         |         |      |                                                            |                                              |
|---|---------|---------|------|------------------------------------------------------------|----------------------------------------------|
| 1 | 678760  | 677804  | 957  | Sucrose operon repressor ScrR, LacI family                 | Sucrose utilization                          |
| 1 | 680175  | 678757  | 1419 | Sucrose-6-phosphate hydrolase (EC 3.2.1.26)                |                                              |
| 1 | 682319  | 683191  | 873  | Fructokinase (EC 2.7.1.4)                                  |                                              |
| 1 | 1555092 | 1554217 | 876  | Fructokinase (EC 2.7.1.4)                                  |                                              |
| 1 | 476733  | 477398  | 666  | Beta-phosphoglucomutase (EC 5.4.2.6)                       | Maltose and Maltodextrin Utilization         |
| 1 | 695142  | 697145  | 2004 | 4-alpha-glucanotransferase (amylomaltase) (EC 2.4.1.25)    |                                              |
| 1 | 701134  | 703536  | 2403 | Glycogen phosphorylase (EC 2.4.1.1)                        |                                              |
| 1 | 703626  | 705428  | 1803 | Neopullulanase (EC 3.2.1.135)                              |                                              |
| 1 | 733213  | 735405  | 2193 | Maltodextrin glucosidase (EC 3.2.1.20)                     |                                              |
| 1 | 1301112 | 1300549 | 564  | Maltose O-acetyltransferase (EC 2.3.1.79)                  |                                              |
| 1 | 1402686 | 1402060 | 627  | Maltose O-acetyltransferase (EC 2.3.1.79)                  |                                              |
| 1 | 1583755 | 1582751 | 1005 | Aldose 1-epimerase (EC 5.1.3.3)                            |                                              |
| 1 | 1804196 | 1803222 | 975  | Maltose operon transcriptional repressor MalR, LacI family |                                              |
| 1 | 1806604 | 1804349 | 2256 | Maltose phosphorylase (EC 2.4.1.8)                         |                                              |
| 1 | 1808336 | 1806627 | 1710 | Alpha-glucosidase (EC 3.2.1.20)                            |                                              |
| 1 | 1809953 | 1808379 | 1575 | Alpha-amylase (EC 3.2.1.1)                                 |                                              |
| 1 | 1810548 | 1809943 | 606  | Maltose O-acetyltransferase (EC 2.3.1.79)                  |                                              |
| 1 | 1814161 | 1812407 | 1755 | Neopullulanase (EC 3.2.1.135)                              |                                              |
| 1 | 2155033 | 2154014 | 1020 | Aldose 1-epimerase (EC 5.1.3.3)                            |                                              |
| 1 | 216882  | 216043  | 840  | UDP-glucose 4-epimerase (EC 5.1.3.2)                       | Lactose and Galactose Uptake and Utilization |
| 1 | 850298  | 849513  | 786  | Galactose-1-phosphate uridylyltransferase (EC 2.7.7.10)    |                                              |
| 1 | 1583755 | 1582751 | 1005 | Aldose 1-epimerase (EC 5.1.3.3)                            |                                              |

|   |         |         |      |                                                             |                                            |
|---|---------|---------|------|-------------------------------------------------------------|--------------------------------------------|
| 1 | 2151015 | 2150035 | 981  | UDP-glucose 4-epimerase (EC 5.1.3.2)                        |                                            |
| 1 | 2152614 | 2151133 | 1482 | Galactose-1-phosphate uridylyltransferase (EC 2.7.7.10)     |                                            |
| 1 | 2153987 | 2152788 | 1200 | Galactokinase (EC 2.7.1.6)                                  |                                            |
| 1 | 2155033 | 2154014 | 1020 | Aldose 1-epimerase (EC 5.1.3.3)                             |                                            |
| 1 | 2156551 | 2155163 | 1389 | Lactose and galactose permease, GPH translocator family     |                                            |
| 1 | 783688  | 784635  | 948  | Mannose-6-phosphate isomerase (EC 5.3.1.8)                  | Mannose Metabolism                         |
| 1 | 1572505 | 1574658 | 2154 | Alpha-1,2-mannosidase                                       |                                            |
| 1 | 1836368 | 1836751 | 384  | Putative regulator of the mannose operon, ManO              |                                            |
| 1 | 1837632 | 1837991 | 360  | Putative regulator of the mannose operon, ManO              |                                            |
| 1 | 1763114 | 1762212 | 903  | Ribokinase (EC 2.7.1.15)                                    | D-ribose utilization                       |
| 1 | 1764108 | 1763125 | 984  | Ribose operon repressor                                     |                                            |
| 1 | 1386399 | 1385266 | 1134 | Endo-1,4-beta-xylanase A precursor (EC 3.2.1.8)             | Xylose utilization                         |
| 1 | 1387258 | 1386401 | 858  | Possible alpha-xyloside ABC transporter, permease component |                                            |
| 1 | 1388202 | 1387258 | 945  | Possible alpha-xyloside ABC transporter, permease component |                                            |
| 1 | 1578679 | 1577306 | 1374 | D-xylose proton-symporter XylT                              |                                            |
| 1 | 1582685 | 1581213 | 1473 | Xyloside transporter XynT                                   |                                            |
| 1 | 1585263 | 1583758 | 1506 | Xylulose kinase (EC 2.7.1.17)                               |                                            |
| 1 | 1586649 | 1585330 | 1320 | Xylose isomerase (EC 5.3.1.5)                               |                                            |
| 1 | 1586760 | 1587704 | 945  | Xylose activator XylR (AraC family)                         |                                            |
| 1 | 959695  | 960930  | 1236 | Phosphopentomutase (EC 5.4.2.7)                             | Deoxyribose and Deoxynucleoside Catabolism |
| 1 | 961326  | 962030  | 705  | Purine nucleoside phosphorylase (EC 2.4.2.1)                |                                            |
| 1 | 1497272 | 1496610 | 663  | Deoxyribose-phosphate aldolase (EC 4.1.2.4)                 |                                            |

|   |         |         |      |                                                                                                            |                                                |
|---|---------|---------|------|------------------------------------------------------------------------------------------------------------|------------------------------------------------|
| 1 | 1498767 | 1497475 | 1293 | Pyrimidine-nucleoside phosphorylase (EC 2.4.2.2)                                                           |                                                |
| 1 | 1763114 | 1762212 | 903  | Ribokinase (EC 2.7.1.15)                                                                                   |                                                |
| 1 | 1386399 | 1385266 | 1134 | Endo-1,4-beta-xylanase A precursor (EC 3.2.1.8)                                                            | D-Galacturonate and D-Glucuronate Utilization, |
| 1 | 1743825 | 1743184 | 642  | 4-hydroxy-2-oxoglutarate aldolase (EC 4.1.3.16) @ 2-dehydro-3-deoxyphosphogluconate aldolase (EC 4.1.2.14) |                                                |
| 1 | 1746193 | 1744775 | 1419 | Uronate isomerase (EC 5.3.1.12)                                                                            |                                                |
| 1 | 1749932 | 1748856 | 1077 | Mannonate dehydratase (EC 4.2.1.8)                                                                         |                                                |
| 1 | 1751693 | 1750221 | 1473 | D-mannonate oxidoreductase (EC 1.1.1.57)                                                                   |                                                |
| 1 | 1808336 | 1806627 | 1710 | Alpha-glucosidase (EC 3.2.1.20)                                                                            |                                                |

#### Adhesion genes

| Scaffold | Start   | Stop    | Length (nt) | Function                                                           | Subsystems |
|----------|---------|---------|-------------|--------------------------------------------------------------------|------------|
| 1        | 121388  | 127339  | 5952        | Collagen adhesion protein                                          | - none -   |
| 1        | 1437668 | 1439290 | 1623        | Fibronectin/fibrinogen-binding protein                             | - none -   |
| 30       | 7682    | 4803    | 2880        | Putative peptidoglycan bound protein (LPXTG motif) Lmo2178 homolog | - none -   |
| 1        | 1192997 | 1195465 | 2469        | hypothetical protein                                               | - none -   |
| 1        | 659325  | 660779  | 1455        | Collagen adhesin                                                   | - none -   |
| 1        | 2267720 | 2267337 | 384         | Late competence protein ComGC, access of DNA to ComEA, FIG007487   | - none -   |
| 1        | 1136068 | 1136508 | 441         | dCMP deaminase (EC 3.5.4.12) @ Late competence protein ComEB       | - none -   |
| 1        | 1917458 | 1916811 | 648         | Late competence protein ComEA, DNA receptor                        | - none -   |
| 1        | 2192829 | 2193494 | 666         | Late competence protein ComC, processing protease                  | - none -   |
| 1        | 2266230 | 2265946 | 285         | Late competence protein ComGG, FIG068335                           | - none -   |
| 1        | 2266652 | 2266269 | 384         | Late competence protein ComGF, access of DNA to ComEA, FIG012620   | - none -   |



|   |         |         |      |                                                                                                                                                                                                                                      |                                                                             |
|---|---------|---------|------|--------------------------------------------------------------------------------------------------------------------------------------------------------------------------------------------------------------------------------------|-----------------------------------------------------------------------------|
| 1 | 2266974 | 2266678 | 297  | Late competence protein ComGE, FIG075573                                                                                                                                                                                             | - none -                                                                    |
| 1 | 2267344 | 2266946 | 399  | Late competence protein ComGD, access of DNA to ComEA, FIG038316                                                                                                                                                                     | - none -                                                                    |
| 1 | 2267720 | 2267337 | 384  | Late competence protein ComGC, access of DNA to ComEA, FIG007487                                                                                                                                                                     | - none -                                                                    |
| 1 | 2268678 | 2267734 | 945  | Late competence protein ComGB, access of DNA to ComEA                                                                                                                                                                                | - none -                                                                    |
| 1 | 2269627 | 2268701 | 927  | Late competence protein ComGA, access of DNA to ComEA                                                                                                                                                                                | - none -                                                                    |
| 1 | 773853  | 775148  | 1296 | Sortase A, LPXTG specific                                                                                                                                                                                                            | Heme, hemin uptake and utilization systems in GramPositives,<br><br>Sortase |
| 1 | 1107874 | 1108620 | 747  | Sortase A, LPXTG specific                                                                                                                                                                                                            | Heme, hemin uptake and utilization systems in GramPositives,<br><br>Sortase |
| 1 | 2328941 | 2326140 | 2802 | internalin, putative (LPXTG motif)                                                                                                                                                                                                   | Listeria surface proteins: Internalin-like proteins                         |
| 1 | 220226  | 222646  | 2421 | Anchorage subunit of a-agglutinin of a-cells, highly O-glycosylated protein with N-terminal secretion signal and C-terminal signal for addition of GPI anchor to cell wall, linked to adhesion subunit Aga2p via two disulfide bonds | - none -                                                                    |
| 1 | 223428  | 224180  | 753  | Anchorage subunit of a-agglutinin of a-cells, highly O-glycosylated protein with N-terminal secretion signal and C-terminal signal for addition of GPI anchor to cell wall, linked to adhesion subunit Aga2p via two disulfide bonds | - none -                                                                    |
| 1 | 658405  | 659298  | 894  | Polysaccharide intercellular adhesin (PIA) biosynthesis deacetylase IcaB (EC 3.-.-.-)                                                                                                                                                | Polysaccharide deacetylases                                                 |
| 1 | 866208  | 866660  | 453  | Anchorage subunit of a-agglutinin of a-cells, highly O-glycosylated protein with N-terminal secretion signal and C-terminal signal for addition of GPI anchor to cell wall, linked to adhesion subunit Aga2p via two disulfide bonds | - none -                                                                    |
| 1 | 866846  | 867433  | 588  | Anchorage subunit of a-agglutinin of a-cells, highly O-glycosylated protein with N-terminal secretion signal and C-                                                                                                                  | - none -                                                                    |

terminal signal for addition of GPI anchor to cell wall, linked to adhesion subunit Aga2p via two disulfide bonds

|    |         |         |      |                                                                                                                                                                                                                                      |                                                                                                                                        |
|----|---------|---------|------|--------------------------------------------------------------------------------------------------------------------------------------------------------------------------------------------------------------------------------------|----------------------------------------------------------------------------------------------------------------------------------------|
| 1  | 868852  | 869640  | 789  | Anchorage subunit of a-agglutinin of a-cells, highly O-glycosylated protein with N-terminal secretion signal and C-terminal signal for addition of GPI anchor to cell wall, linked to adhesion subunit Aga2p via two disulfide bonds | - none -                                                                                                                               |
| 1  | 1629375 | 1626946 | 2430 | Anchorage subunit of a-agglutinin of a-cells, highly O-glycosylated protein with N-terminal secretion signal and C-terminal signal for addition of GPI anchor to cell wall, linked to adhesion subunit Aga2p via two disulfide bonds | - none -                                                                                                                               |
| 1  | 771944  | 773788  | 1845 | Streptococcal hemagglutinin protein                                                                                                                                                                                                  | - none -                                                                                                                               |
| 30 | 4721    | 3228    | 1494 | hypothetical protein                                                                                                                                                                                                                 | - none -                                                                                                                               |
| 1  | 1484349 | 1485107 | 759  | Conserved Membrane Protein (Archaea)                                                                                                                                                                                                 | - none -                                                                                                                               |
| 1  | 2042232 | 2041045 | 1188 | Translation elongation factor Tu                                                                                                                                                                                                     | Mycobacterium virulence operon involved in protein synthesis (SSU ribosomal proteins),<br><br>Translation elongation factors bacterial |
| 1  | 431926  | 433554  | 1629 | Heat shock protein 60 kDa family chaperone GroEL                                                                                                                                                                                     | - none -                                                                                                                               |

---

Table S3. Genes related to amino acid synthesis, vitamin synthesis, carbohydrate metabolism, and adhesion identified in *Priestia megaterium* M4.

| Amino acid |         |         |             |                                                                                         |                                                             |
|------------|---------|---------|-------------|-----------------------------------------------------------------------------------------|-------------------------------------------------------------|
| Scaffold   | Start   | Stop    | Length (nt) | Function                                                                                | Subsystems                                                  |
| 1          | 585134  | 585532  | 399         | glutamine synthetase family protein                                                     | Glutamine, Glutamate, Aspartate and Asparagine Biosynthesis |
| 1          | 612781  | 614628  | 1848        | Asparagine synthetase [glutamine-hydrolyzing] (EC 6.3.5.4) YisO                         |                                                             |
| 1          | 770815  | 771804  | 990         | Glutaminase (EC 3.5.1.2)                                                                |                                                             |
| 1          | 817728  | 819125  | 1398        | Transcriptional regulator, GntR family domain / Aspartate aminotransferase (EC 2.6.1.1) |                                                             |
| 1          | 1053289 | 1055226 | 1938        | Asparagine synthetase [glutamine-hydrolyzing] (EC 6.3.5.4)                              |                                                             |
| 1          | 1120156 | 1121736 | 1581        | Ferredoxin-dependent glutamate synthase (EC 1.4.7.1)                                    |                                                             |
| 1          | 1374949 | 1376133 | 1185        | Aspartate aminotransferase (EC 2.6.1.1)                                                 |                                                             |
| 1          | 2057729 | 2062282 | 4554        | Glutamate synthase [NADPH] large chain (EC 1.4.1.13)                                    |                                                             |
| 1          | 2062299 | 2063780 | 1482        | Glutamate synthase [NADPH] small chain (EC 1.4.1.13)                                    |                                                             |
| 1          | 2157889 | 2156447 | 1443        | Transcriptional regulator, GntR family domain / Aspartate aminotransferase (EC 2.6.1.1) |                                                             |
| 1          | 2387073 | 2387315 | 243         | Transcriptional regulator, GntR family domain / Aspartate aminotransferase (EC 2.6.1.1) |                                                             |

|   |         |         |      |                                                                                               |                                   |
|---|---------|---------|------|-----------------------------------------------------------------------------------------------|-----------------------------------|
| 1 | 2393419 | 2394711 | 1293 | NAD-specific glutamate dehydrogenase (EC 1.4.1.2)                                             |                                   |
| 1 | 2679882 | 2678449 | 1434 | Transcriptional regulator, GntR family domain / Aspartate aminotransferase (EC 2.6.1.1)       |                                   |
| 1 | 3070449 | 3071825 | 1377 | Transcriptional regulator, GntR family domain / Aspartate aminotransferase (EC 2.6.1.1)       |                                   |
| 1 | 3158531 | 3157101 | 1431 | Aspartate ammonia-lyase (EC 4.3.1.1)                                                          |                                   |
| 1 | 34287   | 34003   | 285  | Transition state regulatory protein AbrB                                                      | Poly-gamma-glutamate biosynthesis |
| 1 | 965535  | 966716  | 1182 | Poly-gamma-glutamate synthase subunit PgsB/CapB (EC 6.3.2.-)                                  |                                   |
| 1 | 966733  | 967182  | 450  | Poly-gamma-glutamate synthase subunit PgsC/CapC (EC 6.3.2.-)                                  |                                   |
| 1 | 967223  | 968419  | 1197 | Poly-gamma-glutamate synthase subunit PgsA/CapA (EC 6.3.2.-)                                  |                                   |
| 1 | 968449  | 970011  | 1563 | Gamma-glutamyltranspeptidase PgsD/CapD (EC 2.3.2.2), catalyses PGA anchorage to peptidoglycan |                                   |
| 1 | 970359  | 971921  | 1563 | Gamma-glutamyltranspeptidase PgsD/CapD (EC 2.3.2.2), catalyses PGA anchorage to peptidoglycan |                                   |
| 1 | 1509190 | 1510878 | 1689 | Gamma-glutamyltranspeptidase (EC 2.3.2.2) @ Glutathione hydrolase (EC 3.4.19.13)              |                                   |
| 1 | 1966417 | 1966713 | 297  | Transition state regulatory protein AbrB                                                      |                                   |
| 1 | 3098940 | 3097330 | 1611 | Gamma-glutamyltranspeptidase (EC 2.3.2.2) @ Glutathione hydrolase (EC 3.4.19.13)              |                                   |

|   |         |         |      |                                                                                                                                 |                         |
|---|---------|---------|------|---------------------------------------------------------------------------------------------------------------------------------|-------------------------|
| 1 | 3329159 | 3327549 | 1611 | Gamma-glutamyltranspeptidase (EC 2.3.2.2) @<br>Glutathione hydrolase (EC 3.4.19.13)                                             |                         |
| 1 | 3569970 | 3570287 | 318  | Transition state regulatory protein AbrB                                                                                        |                         |
| 1 | 3877865 | 3875787 | 2079 | Gamma-glutamyltranspeptidase (EC 2.3.2.2) @<br>Glutathione hydrolase (EC 3.4.19.13)                                             |                         |
| 1 | 4684072 | 4683278 | 795  | Glutamate racemase (EC 5.1.1.3)                                                                                                 |                         |
| 1 | 1073812 | 1074603 | 792  | Histidinol-phosphatase (EC 3.1.3.15)                                                                                            | Histidine Biosynthesis  |
| 1 | 3369023 | 3369841 | 819  | Histidinol-phosphatase (EC 3.1.3.15)                                                                                            |                         |
| 1 | 4318171 | 4317068 | 1104 | Biosynthetic Aromatic amino acid aminotransferase beta<br>(EC 2.6.1.57) @ Histidinol-phosphate aminotransferase<br>(EC 2.6.1.9) |                         |
| 1 | 4786897 | 4787691 | 795  | Histidinol-phosphatase (EC 3.1.3.15)                                                                                            |                         |
| 1 | 5014297 | 5013674 | 624  | Phosphoribosyl-AMP cyclohydrolase (EC 3.5.4.19) /<br>Phosphoribosyl-ATP pyrophosphatase (EC 3.6.1.31)                           |                         |
| 1 | 5015786 | 5015052 | 735  | Phosphoribosylformimino-5-aminoimidazole<br>carboxamide ribotide isomerase (EC 5.3.1.16)                                        |                         |
| 1 | 5017005 | 5016421 | 585  | Imidazoleglycerol-phosphate dehydratase (EC 4.2.1.19)                                                                           |                         |
| 1 | 5018349 | 5017081 | 1269 | Histidinol dehydrogenase (EC 1.1.1.23)                                                                                          |                         |
| 1 | 5020178 | 5018997 | 1182 | ATP phosphoribosyltransferase regulatory subunit (EC<br>2.4.2.17)                                                               |                         |
| 1 | 69166   | 70104   | 939  | Cysteine synthase (EC 2.5.1.47)                                                                                                 | Methionine Biosynthesis |

|   |         |         |      |                                                                                                      |                                  |
|---|---------|---------|------|------------------------------------------------------------------------------------------------------|----------------------------------|
| 1 | 98672   | 99331   | 660  | Serine acetyltransferase (EC 2.3.1.30)                                                               |                                  |
| 1 | 788584  | 787277  | 1308 | O-acetylhomoserine sulfhydrylase (EC 2.5.1.49) @ O-succinylhomoserine sulfhydrylase (EC 2.5.1.48)    |                                  |
| 1 | 819260  | 820195  | 936  | Homocysteine S-methyltransferase (EC 2.1.1.10)                                                       |                                  |
| 1 | 1275820 | 1272377 | 3444 | 5-methyltetrahydrofolate--homocysteine methyltransferase (EC 2.1.1.13)                               |                                  |
| 1 | 1277659 | 1275821 | 1839 | 5,10-methylenetetrahydrofolate reductase (EC 1.5.1.20) / Homolog of homocysteine-binding domain      |                                  |
| 1 | 1391502 | 1392647 | 1146 | Cystathionine gamma-synthase (EC 2.5.1.48)                                                           |                                  |
| 1 | 1392631 | 1393812 | 1182 | Cystathionine beta-lyase (EC 4.4.1.8)                                                                |                                  |
| 1 | 1856096 | 1857310 | 1215 | Cystathionine gamma-synthase (EC 2.5.1.48)                                                           |                                  |
| 1 | 1936565 | 1935654 | 912  | Homoserine O-succinyltransferase (EC 2.3.1.46)                                                       |                                  |
| 1 | 2186857 | 2188167 | 1311 | Methionine transporter MetT                                                                          |                                  |
| 1 | 3517977 | 3515683 | 2295 | 5-methyltetrahydropteroyltriglutamate--homocysteine methyltransferase (EC 2.1.1.14)                  |                                  |
| 1 | 3821716 | 3820838 | 879  | 5'-methylthioadenosine nucleosidase (EC 3.2.2.16) @ S-adenosylhomocysteine nucleosidase (EC 3.2.2.9) |                                  |
| 1 | 4569687 | 4568554 | 1134 | Cystathionine gamma-lyase (EC 4.4.1.1) @ Homocysteine desulfhydrase (EC 4.4.1.2)                     |                                  |
| 1 | 4570612 | 4569689 | 924  | Cystathionine beta-synthase (EC 4.2.1.22)                                                            |                                  |
| 1 | 1296159 | 1294996 | 1164 | N-acetyl-L,L-diaminopimelate aminotransferase (EC 2.6.1.-)                                           | Lysine Biosynthesis DAP Pathway, |
| 1 | 1310867 | 1311586 | 720  | 2,3,4,5-tetrahydropyridine-2,6-dicarboxylate N-acetyltransferase (EC 2.3.1.89)                       |                                  |
| 1 | 1311730 | 1312857 | 1128 | N-acetyl-L,L-diaminopimelate deacetylase (EC 3.5.1.47)                                               |                                  |

|   |         |         |      |                                                                                         |                                       |
|---|---------|---------|------|-----------------------------------------------------------------------------------------|---------------------------------------|
| 1 | 1362474 | 1363274 | 801  | 4-hydroxy-tetrahydrodipicolinate reductase (EC 1.17.1.8)                                |                                       |
| 1 | 2099270 | 2100652 | 1383 | Aspartokinase (EC 2.7.2.4)                                                              |                                       |
| 1 | 2310107 | 2308779 | 1329 | Diaminopimelate decarboxylase (EC 4.1.1.20)                                             |                                       |
| 1 | 4138104 | 4137232 | 873  | 4-hydroxy-tetrahydrodipicolinate synthase (EC 4.3.3.7)                                  |                                       |
| 1 | 4139412 | 4138180 | 1233 | Aspartokinase (EC 2.7.2.4)                                                              |                                       |
| 1 | 4140495 | 4139452 | 1044 | Aspartate-semialdehyde dehydrogenase (EC 1.2.1.11)                                      |                                       |
| 1 | 4379119 | 4377800 | 1320 | Diaminopimelate decarboxylase (EC 4.1.1.20)                                             |                                       |
| 1 | 4703432 | 4702200 | 1233 | Aspartokinase (EC 2.7.2.4)                                                              |                                       |
| 1 | 4923229 | 4922375 | 855  | Diaminopimelate epimerase (EC 5.1.1.7)                                                  |                                       |
| 1 | 817728  | 819125  | 1398 | Transcriptional regulator, GntR family domain / Aspartate aminotransferase (EC 2.6.1.1) | Threonine and Homoserine Biosynthesis |
| 1 | 1374949 | 1376133 | 1185 | Aspartate aminotransferase (EC 2.6.1.1)                                                 |                                       |
| 1 | 2099270 | 2100652 | 1383 | Aspartokinase (EC 2.7.2.4)                                                              |                                       |
| 1 | 2157889 | 2156447 | 1443 | Transcriptional regulator, GntR family domain / Aspartate aminotransferase (EC 2.6.1.1) |                                       |
| 1 | 2387073 | 2387315 | 243  | Transcriptional regulator, GntR family domain / Aspartate aminotransferase (EC 2.6.1.1) |                                       |

|   |         |         |      |                                                                                         |                        |
|---|---------|---------|------|-----------------------------------------------------------------------------------------|------------------------|
| 1 | 2679882 | 2678449 | 1434 | Transcriptional regulator, GntR family domain / Aspartate aminotransferase (EC 2.6.1.1) |                        |
| 1 | 3070449 | 3071825 | 1377 | Transcriptional regulator, GntR family domain / Aspartate aminotransferase (EC 2.6.1.1) |                        |
| 1 | 3932310 | 3930901 | 1410 | Transcriptional regulator, GntR family domain / Aspartate aminotransferase (EC 2.6.1.1) |                        |
| 1 | 4139412 | 4138180 | 1233 | Aspartokinase (EC 2.7.2.4)                                                              |                        |
| 1 | 4140495 | 4139452 | 1044 | Aspartate-semialdehyde dehydrogenase (EC 1.2.1.11)                                      |                        |
| 1 | 4703432 | 4702200 | 1233 | Aspartokinase (EC 2.7.2.4)                                                              |                        |
| 1 | 4927015 | 4926101 | 915  | Homoserine kinase (EC 2.7.1.39)                                                         |                        |
| 1 | 4928073 | 4927009 | 1065 | Threonine synthase (EC 4.2.3.1)                                                         |                        |
| 1 | 4929371 | 4928070 | 1302 | Homoserine dehydrogenase (EC 1.1.1.3)                                                   |                        |
| 1 | 69166   | 70104   | 939  | Cysteine synthase (EC 2.5.1.47)                                                         | Cysteine Biosynthesis, |
| 1 | 98672   | 99331   | 660  | Serine acetyltransferase (EC 2.3.1.30)                                                  |                        |
| 1 | 2083788 | 2084852 | 1065 | Sulfate and thiosulfate binding protein CysP                                            |                        |
| 1 | 2084947 | 2085783 | 837  | Sulfate transport system permease protein CysT                                          |                        |
| 1 | 2085796 | 2086662 | 867  | Sulfate transport system permease protein CysW                                          |                        |



|   |         |         |      |                                                                                                      |                                         |
|---|---------|---------|------|------------------------------------------------------------------------------------------------------|-----------------------------------------|
| 1 | 2086682 | 2087755 | 1074 | Sulfate and thiosulfate import ATP-binding protein CysA (EC 3.6.3.25)                                |                                         |
| 1 | 2558449 | 2560068 | 1620 | Sulfate permease                                                                                     |                                         |
| 1 | 3176578 | 3174857 | 1722 | Sulfite reductase [NADPH] hemoprotein beta-component (EC 1.8.1.2)                                    |                                         |
| 1 | 3178412 | 3176601 | 1812 | Sulfite reductase [NADPH] flavoprotein alpha-component (EC 1.8.1.2)                                  |                                         |
| 1 | 3430222 | 3428960 | 1263 | Sulfate permease                                                                                     |                                         |
| 1 | 3463738 | 3462308 | 1431 | Sulfate permease                                                                                     |                                         |
| 1 | 3987976 | 3986528 | 1449 | Sulfate permease                                                                                     |                                         |
| 1 | 4569687 | 4568554 | 1134 | Cystathionine gamma-lyase (EC 4.4.1.1) @ Homocysteine desulfhydrase (EC 4.4.1.2)                     |                                         |
| 1 | 4570612 | 4569689 | 924  | Cystathionine beta-synthase (EC 4.2.1.22)                                                            |                                         |
| 1 | 4820972 | 4821904 | 933  | Cysteine synthase (EC 2.5.1.47)                                                                      |                                         |
| 1 | 1566728 | 1566306 | 423  | 3-isopropylmalate dehydrogenase (EC 1.1.1.85)                                                        | Branched-Chain Amino Acid Biosynthesis, |
| 1 | 2352604 | 2353914 | 1311 | Valine--pyruvate aminotransferase (EC 2.6.1.66)                                                      |                                         |
| 1 | 2415384 | 2416343 | 960  | Threonine dehydratase, catabolic (EC 4.3.1.19) @ L-serine dehydratase, (PLP)-dependent (EC 4.3.1.17) |                                         |
| 1 | 2482633 | 2480957 | 1677 | Dihydroxy-acid dehydratase (EC 4.2.1.9)                                                              |                                         |
| 1 | 2487512 | 2486439 | 1074 | Branched-chain amino acid aminotransferase (EC 2.6.1.42)                                             |                                         |
| 1 | 3133446 | 3134213 | 768  | 2-isopropylmalate synthase (EC 2.3.3.13)                                                             |                                         |

|   |         |         |      |                                                           |                       |
|---|---------|---------|------|-----------------------------------------------------------|-----------------------|
| 1 | 4018516 | 4017245 | 1272 | Threonine dehydratase biosynthetic (EC 4.3.1.19)          |                       |
| 1 | 4671757 | 4671167 | 591  | 3-isopropylmalate dehydratase small subunit (EC 4.2.1.33) |                       |
| 1 | 4673187 | 4671772 | 1416 | 3-isopropylmalate dehydratase large subunit (EC 4.2.1.33) |                       |
| 1 | 4674355 | 4673246 | 1110 | 3-isopropylmalate dehydrogenase (EC 1.1.1.85)             |                       |
| 1 | 4675910 | 4674375 | 1536 | 2-isopropylmalate synthase (EC 2.3.3.13)                  |                       |
| 1 | 4677499 | 4676987 | 513  | Acetolactate synthase small subunit (EC 2.2.1.6)          |                       |
| 1 | 4679202 | 4677496 | 1707 | Acetolactate synthase large subunit (EC 2.2.1.6)          |                       |
| 1 | 1566728 | 1566306 | 423  | 3-isopropylmalate dehydrogenase (EC 1.1.1.85)             | Leucine Biosynthesis  |
| 1 | 2487512 | 2486439 | 1074 | Branched-chain amino acid aminotransferase (EC 2.6.1.42)  |                       |
| 1 | 3133446 | 3134213 | 768  | 2-isopropylmalate synthase (EC 2.3.3.13)                  |                       |
| 1 | 4671757 | 4671167 | 591  | 3-isopropylmalate dehydratase small subunit (EC 4.2.1.33) |                       |
| 1 | 4673187 | 4671772 | 1416 | 3-isopropylmalate dehydratase large subunit (EC 4.2.1.33) |                       |
| 1 | 4674355 | 4673246 | 1110 | 3-isopropylmalate dehydrogenase (EC 1.1.1.85)             |                       |
| 1 | 4675910 | 4674375 | 1536 | 2-isopropylmalate synthase (EC 2.3.3.13)                  |                       |
| 1 | 1517379 | 1518569 | 1191 | 2-amino-3-ketobutyrate coenzyme A ligase (EC 2.3.1.29)    | Glycine Biosynthesis, |

|   |         |         |      |                                                          |                       |
|---|---------|---------|------|----------------------------------------------------------|-----------------------|
| 1 | 1518607 | 1519566 | 960  | L-threonine 3-dehydrogenase (EC 1.1.1.103)               |                       |
| 1 | 5111151 | 5109907 | 1245 | Serine hydroxymethyltransferase (EC 2.1.2.1)             |                       |
| 1 | 186872  | 188062  | 1191 | Alanine racemase (EC 5.1.1.1)                            | Alanine biosynthesis, |
| 1 | 2352604 | 2353914 | 1311 | Valine--pyruvate aminotransferase (EC 2.6.1.66)          |                       |
| 1 | 2487512 | 2486439 | 1074 | Branched-chain amino acid aminotransferase (EC 2.6.1.42) |                       |
| 1 | 4593191 | 4592049 | 1143 | Cysteine desulfurase (EC 2.8.1.7)                        |                       |
| 1 | 4593631 | 4593215 | 417  | Iron-sulfur cluster regulator IscR                       |                       |
| 1 | 4629287 | 4630423 | 1137 | Cysteine desulfurase (EC 2.8.1.7)                        |                       |
| 1 | 321688  | 322620  | 933  | D-3-phosphoglycerate dehydrogenase (EC 1.1.1.95)         | Serine Biosynthesis   |
| 1 | 541792  | 540695  | 1098 | Phosphoserine aminotransferase (EC 2.6.1.52)             |                       |
| 1 | 1819782 | 1820732 | 951  | D-3-phosphoglycerate dehydrogenase (EC 1.1.1.95)         |                       |
| 1 | 2033009 | 2033974 | 966  | D-3-phosphoglycerate dehydrogenase (EC 1.1.1.95)         |                       |
| 1 | 2379804 | 2381003 | 1200 | D-3-phosphoglycerate dehydrogenase (EC 1.1.1.95)         |                       |
| 1 | 3508886 | 3507921 | 966  | D-3-phosphoglycerate dehydrogenase (EC 1.1.1.95)         |                       |

#### Vitamins

| Contig | Start  | Stop   | Length (nt) | Function                                                    | Subsystems           |
|--------|--------|--------|-------------|-------------------------------------------------------------|----------------------|
| 1      | 421127 | 422122 | 996         | Biotin synthase (EC 2.8.1.6)                                | Biotin biosynthesis, |
| 1      | 499745 | 499137 | 609         | Substrate-specific component BioY of biotin ECF transporter |                      |
| 1      | 569931 | 571463 | 1533        | Long-chain-fatty-acid--CoA ligase (EC 6.2.1.3)              |                      |
| 1      | 800176 | 800739 | 564         | Substrate-specific component BioY of biotin ECF transporter |                      |

|   |         |         |      |                                                                                                      |                      |
|---|---------|---------|------|------------------------------------------------------------------------------------------------------|----------------------|
| 1 | 801476  | 802897  | 1422 | Adenosylmethionine-8-amino-7-oxononanoate aminotransferase (EC 2.6.1.62)                             |                      |
| 1 | 1366728 | 1367717 | 990  | Biotin operon repressor / Biotin--protein ligase (EC 6.3.4.9)(EC 6.3.4.10)(EC 6.3.4.11)(EC 6.3.4.15) |                      |
| 1 | 1647743 | 1649239 | 1497 | Long-chain-fatty-acid--CoA ligase (EC 6.2.1.3)                                                       |                      |
| 1 | 1768016 | 1769209 | 1194 | 3-ketoacyl-CoA thiolase (EC 2.3.1.16) @ Acetyl-CoA acetyltransferase (EC 2.3.1.9)                    |                      |
| 1 | 2317263 | 2318879 | 1617 | Long-chain-fatty-acid--CoA ligase (EC 6.2.1.3)                                                       |                      |
| 1 | 2331267 | 2332457 | 1191 | 3-ketoacyl-CoA thiolase (EC 2.3.1.16) @ Acetyl-CoA acetyltransferase (EC 2.3.1.9)                    |                      |
| 1 | 2407852 | 2409363 | 1512 | Long-chain-fatty-acid--CoA ligase (EC 6.2.1.3)                                                       |                      |
| 1 | 2467094 | 2465661 | 1434 | Long-chain-fatty-acid--CoA ligase (EC 6.2.1.3)                                                       |                      |
| 1 | 2467249 | 2467806 | 558  | Substrate-specific component BioY of biotin ECF transporter                                          |                      |
| 1 | 2468049 | 2468915 | 867  | 3-ketoacyl-CoA thiolase (EC 2.3.1.16) @ Acetyl-CoA acetyltransferase (EC 2.3.1.9)                    |                      |
| 1 | 4711580 | 4709889 | 1692 | Long-chain-fatty-acid--CoA ligase (EC 6.2.1.3)                                                       |                      |
| 1 | 509758  | 510885  | 1128 | Glycine oxidase ThiO (EC 1.4.3.19)                                                                   | Thiamin biosynthesis |
| 1 | 510882  | 511085  | 204  | Sulfur carrier protein ThiS                                                                          |                      |
| 1 | 860069  | 860833  | 765  | Hydroxymethylpyrimidine ABC transporter, ATPase component                                            |                      |
| 1 | 860830  | 861573  | 744  | Hydroxymethylpyrimidine ABC transporter, transmembrane component                                     |                      |
| 1 | 861570  | 862580  | 1011 | Hydroxymethylpyrimidine ABC transporter, substrate-binding component                                 |                      |
| 1 | 2126238 | 2127044 | 807  | Hydroxyethylthiazole kinase (EC 2.7.1.50)                                                            |                      |

|   |         |         |      |                                                                                          |                                             |
|---|---------|---------|------|------------------------------------------------------------------------------------------|---------------------------------------------|
| 1 | 2127058 | 2127702 | 645  | Thiamin-phosphate pyrophosphorylase (EC 2.5.1.3)                                         |                                             |
| 1 | 2224570 | 2225931 | 1362 | Predicted hydroxymethylpyrimidine transporter CytX                                       |                                             |
| 1 | 2508371 | 2507796 | 576  | Substrate-specific component ThiT of thiamin ECF transporter                             |                                             |
| 1 | 4230108 | 4229461 | 648  | Thiamin pyrophosphokinase (EC 2.7.6.2)                                                   |                                             |
| 1 | 4450436 | 4448535 | 1902 | 1-deoxy-D-xylulose 5-phosphate synthase (EC 2.2.1.7)                                     |                                             |
| 1 | 4847572 | 4848342 | 771  | Hydroxymethylpyrimidine ABC transporter, ATPase component                                |                                             |
| 1 | 4848329 | 4849135 | 807  | Hydroxymethylpyrimidine ABC transporter, transmembrane component                         |                                             |
| 1 | 1037730 | 1036621 | 1110 | N-acylamino acid racemase @ O-succinylbenzoate synthase (EC 4.2.1.113)                   | Menaquinone and Phylloquinone Biosynthesis, |
| 1 | 2229363 | 2230283 | 921  | 1,4-dihydroxy-2-naphthoate polyprenyltransferase (EC 2.5.1.74)                           |                                             |
| 1 | 4865103 | 4864000 | 1104 | O-succinylbenzoate synthase (EC 4.2.1.113)                                               |                                             |
| 1 | 4866570 | 4865107 | 1464 | O-succinylbenzoic acid--CoA ligase (EC 6.2.1.26)                                         |                                             |
| 1 | 4867471 | 4866653 | 819  | Naphthoate synthase (EC 4.1.3.36)                                                        |                                             |
| 1 | 4868297 | 4867488 | 810  | 2-succinyl-6-hydroxy-2,4-cyclohexadiene-1-carboxylate synthase (EC 4.2.99.20)            |                                             |
| 1 | 4870055 | 4868301 | 1755 | 2-succinyl-5-enolpyruvyl-6-hydroxy-3-cyclohexene-1-carboxylic-acid synthase (EC 2.2.1.9) |                                             |

|   |         |         |      |                                                                                                                                         |                                      |
|---|---------|---------|------|-----------------------------------------------------------------------------------------------------------------------------------------|--------------------------------------|
| 1 | 4871463 | 4870042 | 1422 | Isochorismate synthase (EC 5.4.4.2) @ Menaquinone-specific isochorismate synthase (EC 5.4.4.2)                                          |                                      |
| 1 | 321688  | 322620  | 933  | D-3-phosphoglycerate dehydrogenase (EC 1.1.1.95)                                                                                        | Pyridoxin (Vitamin B6) Biosynthesis, |
| 1 | 541792  | 540695  | 1098 | Phosphoserine aminotransferase (EC 2.6.1.52)                                                                                            |                                      |
| 1 | 1818626 | 1819630 | 1005 | 4-hydroxythreonine-4-phosphate dehydrogenase (EC 1.1.1.262)                                                                             |                                      |
| 1 | 1819782 | 1820732 | 951  | D-3-phosphoglycerate dehydrogenase (EC 1.1.1.95)                                                                                        |                                      |
| 1 | 2033009 | 2033974 | 966  | D-3-phosphoglycerate dehydrogenase (EC 1.1.1.95)                                                                                        |                                      |
| 1 | 2379804 | 2381003 | 1200 | D-3-phosphoglycerate dehydrogenase (EC 1.1.1.95)                                                                                        |                                      |
| 1 | 3508886 | 3507921 | 966  | D-3-phosphoglycerate dehydrogenase (EC 1.1.1.95)                                                                                        |                                      |
| 1 | 4361008 | 4362582 | 1575 | D-3-phosphoglycerate dehydrogenase (EC 1.1.1.95)                                                                                        |                                      |
| 1 | 4450436 | 4448535 | 1902 | 1-deoxy-D-xylulose 5-phosphate synthase (EC 2.2.1.7)                                                                                    |                                      |
| 1 | 5002129 | 5001122 | 1008 | NAD-dependent glyceraldehyde-3-phosphate dehydrogenase (EC 1.2.1.12)                                                                    |                                      |
| 1 | 63141   | 64517   | 1377 | tRNA(Ile)-lysine synthetase (EC 6.3.4.19)                                                                                               | Folate biosynthesis cluster,         |
| 1 | 64545   | 65084   | 540  | Hypoxanthine-guanine phosphoribosyltransferase (EC 2.4.2.8)                                                                             |                                      |
| 1 | 70202   | 71617   | 1416 | Para-aminobenzoate synthase, aminase component (EC 2.6.1.85)                                                                            |                                      |
| 1 | 71620   | 72201   | 582  | Para-aminobenzoate synthase, amidotransferase component (EC 2.6.1.85) @ Anthranilate synthase, amidotransferase component (EC 4.1.3.27) |                                      |

|   |         |         |     |                                                                                  |
|---|---------|---------|-----|----------------------------------------------------------------------------------|
| 1 | 72206   | 73069   | 864 | Aminodeoxychorismate lyase (EC 4.1.3.38)                                         |
| 1 | 73091   | 73450   | 360 | Dihydroneopterin aldolase (EC 4.1.2.25)                                          |
| 1 | 73451   | 73996   | 546 | 2-amino-4-hydroxy-6-hydroxymethyldihydropteridine pyrophosphokinase (EC 2.7.6.3) |
| 1 | 794242  | 795090  | 849 | Dihydropteroate synthase (EC 2.5.1.15)                                           |
| 1 | 1063681 | 1064325 | 645 | GTP cyclohydrolase I (EC 3.5.4.16) type 1                                        |
| 1 | 1368825 | 1369682 | 858 | Pantoate--beta-alanine ligase (EC 6.3.2.1)                                       |
| 1 | 1369683 | 1370066 | 384 | Aspartate 1-decarboxylase (EC 4.1.1.11)                                          |
| 1 | 2045147 | 2045629 | 483 | transmembrane protein, distant homology with ydbS                                |
| 1 | 4019730 | 4019245 | 486 | Dihydrofolate reductase (EC 1.5.1.3)                                             |
| 1 | 4020050 | 4019727 | 324 | Thymidylate synthase (EC 2.1.1.45)                                               |
| 1 | 4021215 | 4020271 | 945 | Thymidylate synthase (EC 2.1.1.45)                                               |

#### Carbohydrates

| Scaffold | Start   | Stop    | Length (nt) | Function                                        | Subsystems          |
|----------|---------|---------|-------------|-------------------------------------------------|---------------------|
| 1        | 1135623 | 1136600 | 978         | Fructokinase (EC 2.7.1.4)                       | Sucrose utilization |
| 1        | 1537904 | 1536921 | 984         | Sucrose operon repressor ScrR, LacI family      |                     |
| 1        | 1538232 | 1539473 | 1242        | Sucrose permease, major facilitator superfamily |                     |
| 1        | 1550816 | 1554394 | 3579        | Sucrose-6-phosphate hydrolase (EC 3.2.1.26)     |                     |
| 1        | 2048768 | 2049706 | 939         | Fructokinase (EC 2.7.1.4)                       |                     |
| 1        | 3263919 | 3262846 | 1074        | Sucrose operon repressor ScrR, LacI family      |                     |
| 1        | 3742361 | 3743590 | 1230        | Sucrose permease, major facilitator superfamily |                     |
| 1        | 3835284 | 3833806 | 1479        | Sucrose-6-phosphate hydrolase (EC 3.2.1.26)     |                     |

|   |         |         |      |                                                                           |                                              |
|---|---------|---------|------|---------------------------------------------------------------------------|----------------------------------------------|
| 1 | 653013  | 654191  | 1179 | Galactokinase (EC 2.7.1.6)                                                | Lactose and Galactose Uptake and Utilization |
| 1 | 654222  | 655745  | 1524 | Galactose-1-phosphate uridylyltransferase (EC 2.7.7.10)                   |                                              |
| 1 | 1000241 | 1001221 | 981  | UDP-glucose 4-epimerase (EC 5.1.3.2)                                      |                                              |
| 1 | 1243932 | 1243165 | 768  | Galactose-1-phosphate uridylyltransferase (EC 2.7.7.10)                   |                                              |
| 1 | 1830128 | 1831180 | 1053 | Aldose 1-epimerase (EC 5.1.3.3)                                           |                                              |
| 1 | 1094556 | 1095563 | 1008 | Mannose-6-phosphate isomerase (EC 5.3.1.8)                                | Mannose Metabolism                           |
| 1 | 3484493 | 3485704 | 1212 | D-mannose isomerase (EC 5.3.1.7)                                          |                                              |
| 1 | 4494902 | 4492623 | 2280 | Mannose-1-phosphate guanylyltransferase / Phosphomannomutase (EC 5.4.2.8) |                                              |
| 1 | 3041314 | 3040307 | 1008 | 2-ketogluconate utilization repressor PtxS                                | 2-Ketogluconate Utilization                  |
| 1 | 3043370 | 3042090 | 1281 | 2-ketogluconate transporter                                               |                                              |
| 1 | 3044332 | 3043373 | 960  | 2-ketogluconate kinase (EC 2.7.1.13)                                      |                                              |
| 1 | 3045072 | 3044329 | 744  | Epimerase KguE                                                            |                                              |
| 1 | 891567  | 892445  | 879  | Ribokinase (EC 2.7.1.15)                                                  | Deoxyribose and Deoxynucleoside Catabolism   |
| 1 | 2875394 | 2874720 | 675  | Deoxyribose-phosphate aldolase (EC 4.1.2.4)                               |                                              |
| 1 | 2876717 | 2875416 | 1302 | Pyrimidine-nucleoside phosphorylase (EC 2.4.2.2)                          |                                              |
| 1 | 2878179 | 2877229 | 951  | Deoxyribonucleoside regulator DeoR (transcriptional repressor)            |                                              |



|   |         |         |      |                                                                                                 |                                            |
|---|---------|---------|------|-------------------------------------------------------------------------------------------------|--------------------------------------------|
| 1 | 3988898 | 3988194 | 705  | Purine nucleoside phosphorylase (EC 2.4.2.1)                                                    |                                            |
| 1 | 4388145 | 4387315 | 831  | Purine nucleoside phosphorylase (EC 2.4.2.1) @ N-Ribosylnicotinamide phosphorylase (EC 2.4.2.1) |                                            |
| 1 | 4389343 | 4388162 | 1182 | Phosphopentomutase (EC 5.4.2.7)                                                                 |                                            |
| 1 | 718352  | 719251  | 900  | 6-phosphogluconate dehydrogenase, decarboxylating (EC 1.1.1.44)                                 | D-gluconate and ketogluconates metabolism, |
| 1 | 719277  | 720818  | 1542 | Gluconokinase (EC 2.7.1.12)                                                                     |                                            |
| 1 | 722894  | 724222  | 1329 | Gluconate permease                                                                              |                                            |
| 1 | 810397  | 811182  | 786  | Glucose 1-dehydrogenase (EC 1.1.1.47)                                                           |                                            |
| 1 | 1017878 | 1018663 | 786  | Glucose 1-dehydrogenase (EC 1.1.1.47)                                                           |                                            |
| 1 | 1125126 | 1126484 | 1359 | Gluconate transporter family protein                                                            |                                            |
| 1 | 1315701 | 1316597 | 897  | 6-phosphogluconate dehydrogenase, decarboxylating (EC 1.1.1.44)                                 |                                            |
| 1 | 3044332 | 3043373 | 960  | 2-ketogluconate kinase (EC 2.7.1.13)                                                            |                                            |
| 1 | 3292088 | 3291195 | 894  | 6-phosphogluconate dehydrogenase, decarboxylating (EC 1.1.1.44)                                 |                                            |
| 1 | 3379458 | 3378673 | 786  | Glucose 1-dehydrogenase (EC 1.1.1.47)                                                           |                                            |
| 1 | 4049071 | 4047524 | 1548 | Gluconokinase (EC 2.7.1.12)                                                                     |                                            |
| 1 | 5162468 | 5161056 | 1413 | 6-phosphogluconate dehydrogenase, decarboxylating (EC 1.1.1.44)                                 |                                            |

|   |         |         |      |                                                                           |                         |
|---|---------|---------|------|---------------------------------------------------------------------------|-------------------------|
| 1 | 1135623 | 1136600 | 978  | Fructokinase (EC 2.7.1.4)                                                 | Fructose utilization,   |
| 1 | 1286865 | 1287131 | 267  | Phosphotransferase system, phosphocarrier protein HPr                     |                         |
| 1 | 1287131 | 1288852 | 1722 | Phosphoenolpyruvate-protein phosphotransferase of PTS system (EC 2.7.3.9) |                         |
| 1 | 1827487 | 1828155 | 669  | Transaldolase (EC 2.2.1.2)                                                |                         |
| 1 | 2048768 | 2049706 | 939  | Fructokinase (EC 2.7.1.4)                                                 |                         |
| 1 | 2095527 | 2096279 | 753  | Transcriptional repressor of the fructose operon, DeoR family             |                         |
| 1 | 2096276 | 2097190 | 915  | 1-phosphofructokinase (EC 2.7.1.56)                                       |                         |
| 1 | 2289763 | 2290431 | 669  | Transaldolase (EC 2.2.1.2)                                                |                         |
| 1 | 3291148 | 3290480 | 669  | Transaldolase (EC 2.2.1.2)                                                |                         |
| 1 | 3679719 | 3679039 | 681  | Transaldolase (EC 2.2.1.2)                                                |                         |
| 1 | 5123634 | 5122990 | 645  | Transaldolase (EC 2.2.1.2)                                                |                         |
| 1 | 890585  | 891574  | 990  | Ribose operon repressor                                                   | D-ribose utilization    |
| 1 | 891567  | 892445  | 879  | Ribokinase (EC 2.7.1.15)                                                  |                         |
| 1 | 2030874 | 2032382 | 1509 | Xylulose kinase (EC 2.7.1.17)                                             | Xylose utilization      |
| 1 | 3412795 | 3411104 | 1692 | Ribulokinase (EC 2.7.1.16)                                                | L-Arabinose utilization |
| 1 | 3522117 | 3520738 | 1380 | Arabinose-proton symporter                                                |                         |
| 1 | 3523689 | 3522265 | 1425 | L-arabinose isomerase (EC 5.3.1.4)                                        |                         |
| 1 | 3524417 | 3523719 | 699  | L-ribulose-5-phosphate 4-epimerase (EC 5.1.3.4)                           |                         |
| 1 | 3526042 | 3524411 | 1632 | Ribulokinase (EC 2.7.1.16)                                                |                         |

#### Adhesion and aggregation

| Scaffold | Start  | Stop   | Length (nt) | Function                            | Subsystems |
|----------|--------|--------|-------------|-------------------------------------|------------|
| 1        | 874037 | 872700 | 1338        | RNA polymerase sigma-54 factor RpoN | Flagellum, |

|   |         |         |      |                                                    |
|---|---------|---------|------|----------------------------------------------------|
| 1 | 1069181 | 1069047 | 135  | Flagellin protein FlaA                             |
| 1 | 1070277 | 1069504 | 774  | Flagellin protein FlaA                             |
| 1 | 1993988 | 1994782 | 795  | Flagellar motor rotation protein MotA              |
| 1 | 1994775 | 1995608 | 834  | Flagellar motor rotation protein MotB              |
| 1 | 4169985 | 4169224 | 762  | RNA polymerase sigma factor for flagellar operon   |
| 1 | 4174955 | 4174086 | 870  | Flagellar synthesis regulator FleN                 |
| 1 | 4176045 | 4174948 | 1098 | Flagellar biosynthesis protein FlhF                |
| 1 | 4178081 | 4176045 | 2037 | Flagellar biosynthesis protein FlhA                |
| 1 | 4179194 | 4178112 | 1083 | Flagellar biosynthesis protein FlhB                |
| 1 | 4179973 | 4179197 | 777  | Flagellar biosynthesis protein FliR                |
| 1 | 4180245 | 4179976 | 270  | Flagellar biosynthesis protein FliQ                |
| 1 | 4180924 | 4180256 | 669  | Flagellar biosynthesis protein FliP                |
| 1 | 4183136 | 4182006 | 1131 | Flagellar motor switch protein FliN                |
| 1 | 4184127 | 4183126 | 1002 | Flagellar motor switch protein FliM                |
| 1 | 4184792 | 4184583 | 210  | Flagellar protein FlbD                             |
| 1 | 4185619 | 4184828 | 792  | Flagellar hook protein FlgE                        |
| 1 | 4186073 | 4185645 | 429  | Flagellar basal-body rod modification protein FlgD |
| 1 | 4188407 | 4186083 | 2325 | Flagellum-specific ATP synthase FliI               |
| 1 | 4189170 | 4188382 | 789  | Flagellar assembly protein FliH                    |
| 1 | 4190182 | 4189163 | 1020 | Flagellar motor switch protein FliG                |
| 1 | 4191786 | 4190194 | 1593 | Flagellar M-ring protein FliF                      |
| 1 | 4192126 | 4191836 | 291  | Flagellar hook-basal body complex protein FliE     |
| 1 | 4192588 | 4192139 | 450  | Flagellar basal-body rod protein FlgC              |
| 1 | 4192980 | 4192591 | 390  | Flagellar basal-body rod protein FlgB              |

|   |         |         |      |                                                                                                                   |          |
|---|---------|---------|------|-------------------------------------------------------------------------------------------------------------------|----------|
| 1 | 4285627 | 4283711 | 1917 | Cell division protein FtsI [Peptidoglycan synthetase] (EC 2.4.1.129) @ Sporulation peptidoglycan synthetase SpoVD |          |
| 1 | 4287955 | 4285697 | 2259 | Cell division protein FtsI [Peptidoglycan synthetase] (EC 2.4.1.129)                                              |          |
| 1 | 4522977 | 4521844 | 1134 | RNA polymerase sigma factor RpoD                                                                                  |          |
| 1 | 4796913 | 4796302 | 612  | Flagellar motor rotation protein MotB                                                                             |          |
| 1 | 4797751 | 4796948 | 804  | Flagellar motor rotation protein MotA                                                                             |          |
| 1 | 5004908 | 5003598 | 1311 | RNA polymerase sigma-54 factor RpoN                                                                               |          |
| 1 | 5050265 | 5049864 | 402  | Flagellar biosynthesis protein FliS                                                                               |          |
| 1 | 5062238 | 5061357 | 882  | Flagellar hook-associated protein FlgL                                                                            |          |
| 1 | 5063764 | 5062241 | 1524 | Flagellar hook-associated protein FlgK                                                                            |          |
| 1 | 5064250 | 5063783 | 468  | Flagellar biosynthesis protein FlgN                                                                               |          |
| 1 | 5090547 | 5089726 | 822  | Flagellar basal-body rod protein FlgG                                                                             |          |
| 1 | 5091395 | 5090571 | 825  | Flagellar basal-body rod protein FlgF                                                                             |          |
| 1 | 4481948 | 4481511 | 438  | Late competence protein ComGD, access of DNA to ComEA, FIG012777                                                  | - none - |
| 1 | 4482246 | 4481935 | 312  | Late competence protein ComGC, access of DNA to ComEA, FIG007487                                                  | - none - |
| 1 | 4483307 | 4482261 | 1047 | Late competence protein ComGB, access of DNA to ComEA                                                             | - none - |
| 1 | 4483954 | 4483298 | 657  | Late competence protein ComGA, access of DNA to ComEA                                                             | - none - |
| 1 | 4484337 | 4484086 | 252  | Late competence protein ComGA, access of DNA to ComEA                                                             | - none - |
| 1 | 4557266 | 4556700 | 567  | dCMP deaminase (EC 3.5.4.12) @ Late competence protein ComEB                                                      | - none - |
| 1 | 4557998 | 4557363 | 636  | Late competence protein ComEA, DNA receptor                                                                       | - none - |

|   |         |         |      |                                                             |                                                                                                                                        |
|---|---------|---------|------|-------------------------------------------------------------|----------------------------------------------------------------------------------------------------------------------------------------|
| 1 | 4558095 | 4558925 | 831  | Late competence protein ComER, proline oxidase (EC 1.5.1.2) | - none -                                                                                                                               |
| 1 | 3942529 | 3941204 | 1326 | Purple acid phosphatase/fibronectin domain protein          | - none -                                                                                                                               |
| 1 | 4247315 | 4249027 | 1713 | Fibronectin/fibrinogen-binding protein                      | - none -                                                                                                                               |
| 1 | 118718  | 119908  | 1191 | Translation elongation factor Tu                            | Mycobacterium virulence operon involved in protein synthesis (SSU ribosomal proteins),<br><br>Translation elongation factors bacterial |
| 1 | 1733079 | 1734296 | 1218 | Translation elongation factor Tu                            | Mycobacterium virulence operon involved in protein synthesis (SSU ribosomal proteins),<br><br>Translation elongation factors bacterial |
| 1 | 208000  | 209631  | 1632 | Heat shock protein 60 kDa family chaperone GroEL            | - none -                                                                                                                               |

Table S4. Genes related to amino acid synthesis, vitamin synthesis, carbohydrate metabolism, and adhesion identified in *Priestia* sp. M10.

| Amino acid |         |         |             |                                                                                         |                                                              |
|------------|---------|---------|-------------|-----------------------------------------------------------------------------------------|--------------------------------------------------------------|
| Scaffold   | Start   | Stop    | Length (nt) | Function                                                                                | Subsystems                                                   |
| 1          | 600279  | 601073  | 795         | Glutamate racemase (EC 5.1.1.3)                                                         | Glutamine, Glutamate, Aspartate and Asparagine Biosynthesis, |
| 1          | 931927  | 933207  | 1281        | NAD-specific glutamate dehydrogenase (EC 1.4.1.2)                                       |                                                              |
| 1          | 935294  | 934323  | 972         | L-asparaginase (EC 3.5.1.1)                                                             |                                                              |
| 1          | 1193094 | 1194428 | 1335        | Glutamine synthetase type I (EC 6.3.1.2)                                                |                                                              |
| 1          | 1327699 | 1329108 | 1410        | Transcriptional regulator, GntR family domain / Aspartate aminotransferase (EC 2.6.1.1) |                                                              |
| 1          | 1529762 | 1528650 | 1113        | L-asparaginase (EC 3.5.1.1)                                                             |                                                              |
| 1          | 2028662 | 2029645 | 984         | L-asparaginase I, cytoplasmic (EC 3.5.1.1)                                              |                                                              |
| 1          | 2029666 | 2031096 | 1431        | Aspartate ammonia-lyase (EC 4.3.1.1)                                                    |                                                              |
| 1          | 2117824 | 2116448 | 1377        | Transcriptional regulator, GntR family domain / Aspartate aminotransferase (EC 2.6.1.1) |                                                              |
| 1          | 2397478 | 2398911 | 1434        | Transcriptional regulator, GntR family domain / Aspartate aminotransferase (EC 2.6.1.1) |                                                              |
| 1          | 2689346 | 2688054 | 1293        | NAD-specific glutamate dehydrogenase (EC 1.4.1.2)                                       |                                                              |
| 1          | 2696910 | 2695477 | 1434        | Transcriptional regulator, GntR family domain / Aspartate aminotransferase (EC 2.6.1.1) |                                                              |
| 1          | 2927100 | 2928542 | 1443        | Transcriptional regulator, GntR family domain / Aspartate aminotransferase (EC 2.6.1.1) |                                                              |
| 1          | 3020058 | 3018577 | 1482        | Glutamate synthase [NADPH] small chain (EC 1.4.1.13)                                    |                                                              |
| 1          | 3024628 | 3020075 | 4554        | Glutamate synthase [NADPH] large chain (EC 1.4.1.13)                                    |                                                              |
| 1          | 3447917 | 3446475 | 1443        | Aspartate ammonia-lyase (EC 4.3.1.1)                                                    |                                                              |

|    |         |         |      |                                                                                               |                                   |
|----|---------|---------|------|-----------------------------------------------------------------------------------------------|-----------------------------------|
| 1  | 3806176 | 3804992 | 1185 | Aspartate aminotransferase (EC 2.6.1.1)                                                       |                                   |
| 1  | 4058683 | 4057103 | 1581 | Ferredoxin-dependent glutamate synthase (EC 1.4.7.1)                                          |                                   |
| 1  | 4380827 | 4379430 | 1398 | Transcriptional regulator, GntR family domain / Aspartate aminotransferase (EC 2.6.1.1)       |                                   |
| 1  | 4427812 | 4426823 | 990  | Glutaminase (EC 3.5.1.2)                                                                      |                                   |
| 1  | 4582285 | 4580438 | 1848 | Asparagine synthetase [glutamine-hydrolyzing] (EC 6.3.5.4) YisO                               |                                   |
| 31 | 10524   | 11315   | 792  | Glutamate racemase (EC 5.1.1.3)                                                               |                                   |
| 1  | 600279  | 601073  | 795  | Glutamate racemase (EC 5.1.1.3)                                                               | Poly-gamma-glutamate biosynthesis |
| 1  | 1389877 | 1391955 | 2079 | Gamma-glutamyltranspeptidase (EC 2.3.2.2) @ Glutathione hydrolase (EC 3.4.19.13)              |                                   |
| 1  | 1855389 | 1856999 | 1611 | Gamma-glutamyltranspeptidase (EC 2.3.2.2) @ Glutathione hydrolase (EC 3.4.19.13)              |                                   |
| 1  | 2089405 | 2091015 | 1611 | Gamma-glutamyltranspeptidase (EC 2.3.2.2) @ Glutathione hydrolase (EC 3.4.19.13)              |                                   |
| 1  | 3115894 | 3115598 | 297  | Transition state regulatory protein AbrB                                                      |                                   |
| 1  | 3662442 | 3660754 | 1689 | Gamma-glutamyltranspeptidase (EC 2.3.2.2) @ Glutathione hydrolase (EC 3.4.19.13)              |                                   |
| 1  | 4232088 | 4230526 | 1563 | Gamma-glutamyltranspeptidase PgsD/CapD (EC 2.3.2.2), catalyses PGA anchorage to peptidoglycan |                                   |
| 1  | 4233998 | 4232436 | 1563 | Gamma-glutamyltranspeptidase PgsD/CapD (EC 2.3.2.2), catalyses PGA anchorage to peptidoglycan |                                   |
| 1  | 4235224 | 4234028 | 1197 | Poly-gamma-glutamate synthase subunit PgsA/CapA (EC 6.3.2.-)                                  |                                   |
| 1  | 4235714 | 4235265 | 450  | Poly-gamma-glutamate synthase subunit PgsC/CapC (EC 6.3.2.-)                                  |                                   |

|    |         |         |      |                                                                                                                           |                          |
|----|---------|---------|------|---------------------------------------------------------------------------------------------------------------------------|--------------------------|
| 1  | 4236912 | 4235731 | 1182 | Poly-gamma-glutamate synthase subunit PgsB/CapB (EC 6.3.2.-)                                                              |                          |
| 1  | 5159176 | 5159460 | 285  | Transition state regulatory protein AbrB                                                                                  |                          |
| 31 | 10524   | 11315   | 792  | Glutamate racemase (EC 5.1.1.3)                                                                                           |                          |
| 1  | 235497  | 236678  | 1182 | ATP phosphoribosyltransferase regulatory subunit (EC 2.4.2.17)                                                            | Histidine Biosynthesis   |
| 1  | 237326  | 238594  | 1269 | Histidinol dehydrogenase (EC 1.1.1.23)                                                                                    |                          |
| 1  | 238669  | 239253  | 585  | Imidazoleglycerol-phosphate dehydratase (EC 4.2.1.19)                                                                     |                          |
| 1  | 239888  | 240622  | 735  | Phosphoribosylformimino-5-aminoimidazole carboxamide ribotide isomerase (EC 5.3.1.16)                                     |                          |
| 1  | 241377  | 242000  | 624  | Phosphoribosyl-AMP cyclohydrolase (EC 3.5.4.19) / Phosphoribosyl-ATP pyrophosphatase (EC 3.6.1.31)                        |                          |
| 1  | 495892  | 495098  | 795  | Histidinol-phosphatase (EC 3.1.3.15)                                                                                      |                          |
| 1  | 965956  | 967059  | 1104 | Biosynthetic Aromatic amino acid aminotransferase beta (EC 2.6.1.57) @ Histidinol-phosphate aminotransferase (EC 2.6.1.9) |                          |
| 1  | 1814562 | 1813756 | 807  | Histidinol-phosphatase (EC 3.1.3.15)                                                                                      |                          |
| 1  | 1990522 | 1991832 | 1311 | Imidazolonepropionase (EC 3.5.2.7)                                                                                        |                          |
| 1  | 3597377 | 3596394 | 984  | Formiminoglutamase (EC 3.5.3.8)                                                                                           |                          |
| 1  | 3598641 | 3597352 | 1290 | Imidazolonepropionase (EC 3.5.2.7)                                                                                        |                          |
| 1  | 3600319 | 3598658 | 1662 | Urocanate hydratase (EC 4.2.1.49)                                                                                         |                          |
| 1  | 3601883 | 3600369 | 1515 | Histidine ammonia-lyase (EC 4.3.1.3)                                                                                      |                          |
| 1  | 3651885 | 3651421 | 465  | Hut operon positive regulatory protein                                                                                    |                          |
| 1  | 4131096 | 4130305 | 792  | Histidinol-phosphatase (EC 3.1.3.15)                                                                                      |                          |
| 1  | 308167  | 309192  | 1026 | Methionine ABC transporter ATP-binding protein                                                                            | Methionine Biosynthesis, |
| 1  | 309185  | 309853  | 669  | Methionine ABC transporter permease protein                                                                               |                          |



|   |         |         |      |                                                                                                      |
|---|---------|---------|------|------------------------------------------------------------------------------------------------------|
| 1 | 309871  | 310707  | 837  | Methionine ABC transporter substrate-binding protein                                                 |
| 1 | 329259  | 330560  | 1302 | Homoserine dehydrogenase (EC 1.1.1.3)                                                                |
| 1 | 331615  | 332529  | 915  | Homoserine kinase (EC 2.7.1.39)                                                                      |
| 1 | 350542  | 349370  | 1173 | Cystathionine beta-lyase (EC 4.4.1.8)                                                                |
| 1 | 352219  | 353379  | 1161 | Cystathionine beta-lyase (EC 4.4.1.8)                                                                |
| 1 | 431334  | 431807  | 474  | S-ribosylhomocysteine lyase (EC 4.4.1.21) @ Autoinducer-2 production protein LuxS                    |
| 1 | 439998  | 441200  | 1203 | S-adenosylmethionine synthetase (EC 2.5.1.6)                                                         |
| 1 | 462057  | 461125  | 933  | Cysteine synthase (EC 2.5.1.47)                                                                      |
| 1 | 712273  | 712914  | 642  | SAM-dependent methyltransferase YrrT                                                                 |
| 1 | 712932  | 713627  | 696  | 5'-methylthioadenosine nucleosidase (EC 3.2.2.16) @ S-adenosylhomocysteine nucleosidase (EC 3.2.2.9) |
| 1 | 713771  | 714694  | 924  | Cystathionine beta-synthase (EC 4.2.1.22)                                                            |
| 1 | 714696  | 715829  | 1134 | Cystathionine gamma-lyase (EC 4.4.1.1) @ Homocysteine desulfhydrase (EC 4.4.1.2)                     |
| 1 | 1442005 | 1442883 | 879  | 5'-methylthioadenosine nucleosidase (EC 3.2.2.16) @ S-adenosylhomocysteine nucleosidase (EC 3.2.2.9) |
| 1 | 1661394 | 1663688 | 2295 | 5-methyltetrahydropteroyltriglutamate--homocysteine methyltransferase (EC 2.1.1.14)                  |
| 1 | 2894223 | 2892913 | 1311 | Methionine transporter MetT                                                                          |
| 1 | 3145696 | 3146607 | 912  | Homoserine O-succinyltransferase (EC 2.3.1.46)                                                       |
| 1 | 3232746 | 3231532 | 1215 | Cystathionine gamma-synthase (EC 2.5.1.48)                                                           |

|   |         |         |      |                                                                                                   |
|---|---------|---------|------|---------------------------------------------------------------------------------------------------|
| 1 | 3608876 | 3608025 | 852  | Methionine ABC transporter substrate-binding protein                                              |
| 1 | 3609516 | 3608917 | 600  | Methionine ABC transporter permease protein                                                       |
| 1 | 3610591 | 3609509 | 1083 | Methionine ABC transporter ATP-binding protein                                                    |
| 1 | 3611438 | 3610647 | 792  | Methionine ABC transporter substrate-binding protein                                              |
| 1 | 3612719 | 3612054 | 666  | Methionine ABC transporter permease protein                                                       |
| 1 | 3613733 | 3612720 | 1014 | Methionine ABC transporter ATP-binding protein                                                    |
| 1 | 3614564 | 3613746 | 819  | Methionine ABC transporter substrate-binding protein                                              |
| 1 | 3788629 | 3787448 | 1182 | Cystathionine beta-lyase (EC 4.4.1.8)                                                             |
| 1 | 3789758 | 3788613 | 1146 | Cystathionine gamma-synthase (EC 2.5.1.48)                                                        |
| 1 | 3904887 | 3906725 | 1839 | 5,10-methylenetetrahydrofolate reductase (EC 1.5.1.20) / Homolog of homocysteine-binding domain   |
| 1 | 3906726 | 3910169 | 3444 | 5-methyltetrahydrofolate--homocysteine methyltransferase (EC 2.1.1.13)                            |
| 1 | 4379295 | 4378360 | 936  | Homocysteine S-methyltransferase (EC 2.1.1.10)                                                    |
| 1 | 4410139 | 4411446 | 1308 | O-acetylhomoserine sulfhydrylase (EC 2.5.1.49) @ O-succinylhomoserine sulfhydrylase (EC 2.5.1.48) |
| 1 | 5104892 | 5104233 | 660  | Serine acetyltransferase (EC 2.3.1.30)                                                            |
| 1 | 5124289 | 5123351 | 939  | Cysteine synthase (EC 2.5.1.47)                                                                   |
| 1 | 335401  | 336255  | 855  | Diaminopimelate epimerase (EC 5.1.1.7)                                                            |
| 1 | 580921  | 582153  | 1233 | Aspartokinase (EC 2.7.2.4)                                                                        |
| 1 | 905073  | 906392  | 1320 | Diaminopimelate decarboxylase (EC 4.1.1.20)                                                       |
| 1 | 1145933 | 1146976 | 1044 | Aspartate-semialdehyde dehydrogenase (EC 1.2.1.11)                                                |

Lysine Biosynthesis DAP  
Pathway,

|   |         |         |      |                                                                                         |                                       |
|---|---------|---------|------|-----------------------------------------------------------------------------------------|---------------------------------------|
| 1 | 1147016 | 1148248 | 1233 | Aspartokinase (EC 2.7.2.4)                                                              |                                       |
| 1 | 1148324 | 1149196 | 873  | 4-hydroxy-tetrahydrodipicolinate synthase (EC 4.3.3.7)                                  |                                       |
| 1 | 2771723 | 2773051 | 1329 | Diaminopimelate decarboxylase (EC 4.1.1.20)                                             |                                       |
| 1 | 2983518 | 2982136 | 1383 | Aspartokinase (EC 2.7.2.4)                                                              |                                       |
| 1 | 3818650 | 3817850 | 801  | 4-hydroxy-tetrahydrodipicolinate reductase (EC 1.17.1.8)                                |                                       |
| 1 | 3870944 | 3869817 | 1128 | N-acetyl-L,L-diaminopimelate deacetylase (EC 3.5.1.47)                                  |                                       |
| 1 | 3871808 | 3871089 | 720  | 2,3,4,5-tetrahydropyridine-2,6-dicarboxylate N-acetyltransferase (EC 2.3.1.89)          |                                       |
| 1 | 3886563 | 3887729 | 1167 | N-acetyl-L,L-diaminopimelate aminotransferase (EC 2.6.1.-)                              |                                       |
| 1 | 329259  | 330560  | 1302 | Homoserine dehydrogenase (EC 1.1.1.3)                                                   | Threonine and Homoserine Biosynthesis |
| 1 | 330557  | 331621  | 1065 | Threonine synthase (EC 4.2.3.1)                                                         |                                       |
| 1 | 331615  | 332529  | 915  | Homoserine kinase (EC 2.7.1.39)                                                         |                                       |
| 1 | 580921  | 582153  | 1233 | Aspartokinase (EC 2.7.2.4)                                                              |                                       |
| 1 | 1145933 | 1146976 | 1044 | Aspartate-semialdehyde dehydrogenase (EC 1.2.1.11)                                      |                                       |
| 1 | 1147016 | 1148248 | 1233 | Aspartokinase (EC 2.7.2.4)                                                              |                                       |
| 1 | 1327699 | 1329108 | 1410 | Transcriptional regulator, GntR family domain / Aspartate aminotransferase (EC 2.6.1.1) |                                       |
| 1 | 2117824 | 2116448 | 1377 | Transcriptional regulator, GntR family domain / Aspartate aminotransferase (EC 2.6.1.1) |                                       |
| 1 | 2397478 | 2398911 | 1434 | Transcriptional regulator, GntR family domain / Aspartate aminotransferase (EC 2.6.1.1) |                                       |
| 1 | 2696910 | 2695477 | 1434 | Transcriptional regulator, GntR family domain / Aspartate aminotransferase (EC 2.6.1.1) |                                       |
| 1 | 2927100 | 2928542 | 1443 | Transcriptional regulator, GntR family domain / Aspartate aminotransferase (EC 2.6.1.1) |                                       |

|   |         |         |      |                                                                                         |                       |
|---|---------|---------|------|-----------------------------------------------------------------------------------------|-----------------------|
| 1 | 2983518 | 2982136 | 1383 | Aspartokinase (EC 2.7.2.4)                                                              |                       |
| 1 | 3806176 | 3804992 | 1185 | Aspartate aminotransferase (EC 2.6.1.1)                                                 |                       |
| 1 | 4380827 | 4379430 | 1398 | Transcriptional regulator, GntR family domain / Aspartate aminotransferase (EC 2.6.1.1) |                       |
| 1 | 366642  | 367355  | 714  | Phosphoadenylyl-sulfate reductase [thioredoxin] (EC 1.8.4.8)                            | Cysteine Biosynthesis |
| 1 | 369671  | 370270  | 600  | Adenylylsulfate kinase (EC 2.7.1.25)                                                    |                       |
| 1 | 462057  | 461125  | 933  | Cysteine synthase (EC 2.5.1.47)                                                         |                       |
| 1 | 713771  | 714694  | 924  | Cystathionine beta-synthase (EC 4.2.1.22)                                               |                       |
| 1 | 714696  | 715829  | 1134 | Cystathionine gamma-lyase (EC 4.4.1.1) @ Homocysteine desulhydrase (EC 4.4.1.2)         |                       |
| 1 | 1270978 | 1272426 | 1449 | Sulfate permease                                                                        |                       |
| 1 | 1761055 | 1762317 | 1263 | Sulfate permease                                                                        |                       |
| 1 | 2009773 | 2011584 | 1812 | Sulfite reductase [NADPH] flavoprotein alpha-component (EC 1.8.1.2)                     |                       |
| 1 | 2011607 | 2013328 | 1722 | Sulfite reductase [NADPH] hemoprotein beta-component (EC 1.8.1.2)                       |                       |
| 1 | 2504993 | 2503374 | 1620 | Sulfate permease                                                                        |                       |
| 1 | 2996108 | 2995035 | 1074 | Sulfate and thiosulfate import ATP-binding protein CysA (EC 3.6.3.25)                   |                       |
| 1 | 2996994 | 2996128 | 867  | Sulfate transport system permease protein CysW                                          |                       |
| 1 | 2997843 | 2997007 | 837  | Sulfate transport system permease protein CysT                                          |                       |
| 1 | 2999002 | 2997938 | 1065 | Sulfate and thiosulfate binding protein CysP                                            |                       |
| 1 | 5104892 | 5104233 | 660  | Serine acetyltransferase (EC 2.3.1.30)                                                  |                       |

|   |         |         |      |                                                                                |                                           |
|---|---------|---------|------|--------------------------------------------------------------------------------|-------------------------------------------|
| 1 | 5124289 | 5123351 | 939  | Cysteine synthase (EC 2.5.1.47)                                                |                                           |
| 1 | 335401  | 336255  | 855  | Diaminopimelate epimerase (EC 5.1.1.7)                                         | Lysine Biosynthesis DAP<br>Pathway,       |
| 1 | 580921  | 582153  | 1233 | Aspartokinase (EC 2.7.2.4)                                                     |                                           |
| 1 | 905073  | 906392  | 1320 | Diaminopimelate decarboxylase (EC 4.1.1.20)                                    |                                           |
| 1 | 1145933 | 1146976 | 1044 | Aspartate-semialdehyde dehydrogenase (EC 1.2.1.11)                             |                                           |
| 1 | 1147016 | 1148248 | 1233 | Aspartokinase (EC 2.7.2.4)                                                     |                                           |
| 1 | 1148324 | 1149196 | 873  | 4-hydroxy-tetrahydrodipicolinate synthase (EC 4.3.3.7)                         |                                           |
| 1 | 2771723 | 2773051 | 1329 | Diaminopimelate decarboxylase (EC 4.1.1.20)                                    |                                           |
| 1 | 2983518 | 2982136 | 1383 | Aspartokinase (EC 2.7.2.4)                                                     |                                           |
| 1 | 3818650 | 3817850 | 801  | 4-hydroxy-tetrahydrodipicolinate reductase (EC 1.17.1.8)                       |                                           |
| 1 | 3870944 | 3869817 | 1128 | N-acetyl-L,L-diaminopimelate deacetylase (EC 3.5.1.47)                         |                                           |
| 1 | 3871808 | 3871089 | 720  | 2,3,4,5-tetrahydropyridine-2,6-dicarboxylate N-acetyltransferase (EC 2.3.1.89) |                                           |
| 1 | 3886563 | 3887729 | 1167 | N-acetyl-L,L-diaminopimelate aminotransferase (EC 2.6.1.-)                     |                                           |
| 1 | 605156  | 606862  | 1707 | Acetolactate synthase large subunit (EC 2.2.1.6)                               | Branched-Chain Amino Acid<br>Biosynthesis |
| 1 | 606859  | 607371  | 513  | Acetolactate synthase small subunit (EC 2.2.1.6)                               |                                           |
| 1 | 608448  | 609983  | 1536 | 2-isopropylmalate synthase (EC 2.3.3.13)                                       |                                           |
| 1 | 610003  | 611112  | 1110 | 3-isopropylmalate dehydrogenase (EC 1.1.1.85)                                  |                                           |
| 1 | 611171  | 612586  | 1416 | 3-isopropylmalate dehydratase large subunit (EC 4.2.1.33)                      |                                           |
| 1 | 612601  | 613191  | 591  | 3-isopropylmalate dehydratase small subunit (EC 4.2.1.33)                      |                                           |
| 1 | 1240401 | 1241672 | 1272 | Threonine dehydratase biosynthetic (EC 4.3.1.19)                               |                                           |
| 1 | 2054935 | 2054168 | 768  | 2-isopropylmalate synthase (EC 2.3.3.13)                                       |                                           |

|   |         |         |      |                                                           |                       |
|---|---------|---------|------|-----------------------------------------------------------|-----------------------|
| 1 | 2577353 | 2578426 | 1074 | Branched-chain amino acid aminotransferase (EC 2.6.1.42)  |                       |
| 1 | 2582236 | 2583912 | 1677 | Dihydroxy-acid dehydratase (EC 4.2.1.9)                   |                       |
| 1 | 2730741 | 2729440 | 1302 | Valine--pyruvate aminotransferase (EC 2.6.1.66)           |                       |
| 1 | 3593469 | 3594539 | 1071 | 3-isopropylmalate dehydrogenase (EC 1.1.1.85)             |                       |
| 1 | 608448  | 609983  | 1536 | 2-isopropylmalate synthase (EC 2.3.3.13)                  | Leucine Biosynthesis  |
| 1 | 610003  | 611112  | 1110 | 3-isopropylmalate dehydrogenase (EC 1.1.1.85)             |                       |
| 1 | 611171  | 612586  | 1416 | 3-isopropylmalate dehydratase large subunit (EC 4.2.1.33) |                       |
| 1 | 612601  | 613191  | 591  | 3-isopropylmalate dehydratase small subunit (EC 4.2.1.33) |                       |
| 1 | 2054935 | 2054168 | 768  | 2-isopropylmalate synthase (EC 2.3.3.13)                  |                       |
| 1 | 2577353 | 2578426 | 1074 | Branched-chain amino acid aminotransferase (EC 2.6.1.42)  |                       |
| 1 | 3593469 | 3594539 | 1071 | 3-isopropylmalate dehydrogenase (EC 1.1.1.85)             |                       |
| 1 | 144828  | 146072  | 1245 | Serine hydroxymethyltransferase (EC 2.1.2.1)              | Glycine Biosynthesis, |
| 1 | 3653056 | 3652097 | 960  | L-threonine 3-dehydrogenase (EC 1.1.1.103)                |                       |
| 1 | 3654284 | 3653094 | 1191 | 2-amino-3-ketobutyrate coenzyme A ligase (EC 2.3.1.29)    |                       |
| 1 | 655082  | 653946  | 1137 | Cysteine desulfurase (EC 2.8.1.7)                         | Alanine biosynthesis, |
| 1 | 690736  | 691152  | 417  | Iron-sulfur cluster regulator IscR                        |                       |
| 1 | 691176  | 692318  | 1143 | Cysteine desulfurase (EC 2.8.1.7)                         |                       |
| 1 | 2356038 | 2354920 | 1119 | Cysteine desulfurase (EC 2.8.1.7)                         |                       |
| 1 | 2577353 | 2578426 | 1074 | Branched-chain amino acid aminotransferase (EC 2.6.1.42)  |                       |
| 1 | 2730741 | 2729440 | 1302 | Valine--pyruvate aminotransferase (EC 2.6.1.66)           |                       |
| 1 | 5017012 | 5015822 | 1191 | Alanine racemase (EC 5.1.1.1)                             |                       |

|   |         |         |      |                                                  |                     |
|---|---------|---------|------|--------------------------------------------------|---------------------|
| 1 | 144828  | 146072  | 1245 | Serine hydroxymethyltransferase (EC 2.1.2.1)     | Serine Biosynthesis |
| 1 | 1670039 | 1671004 | 966  | D-3-phosphoglycerate dehydrogenase (EC 1.1.1.95) |                     |
| 1 | 2704330 | 2703131 | 1200 | D-3-phosphoglycerate dehydrogenase (EC 1.1.1.95) |                     |
| 1 | 3049350 | 3048385 | 966  | D-3-phosphoglycerate dehydrogenase (EC 1.1.1.95) |                     |
| 1 | 4642166 | 4643263 | 1098 | Phosphoserine aminotransferase (EC 2.6.1.52)     |                     |
| 1 | 4842116 | 4841184 | 933  | D-3-phosphoglycerate dehydrogenase (EC 1.1.1.95) |                     |

#### Vitamins

| Scaffold | Start   | Stop    | Length (nt) | Function                                                                                             | Subsystems           |
|----------|---------|---------|-------------|------------------------------------------------------------------------------------------------------|----------------------|
| 1        | 374923  | 373337  | 1587        | Long-chain-fatty-acid--CoA ligase (EC 6.2.1.3)                                                       | Biotin biosynthesis, |
| 1        | 572782  | 574473  | 1692        | Long-chain-fatty-acid--CoA ligase (EC 6.2.1.3)                                                       |                      |
| 1        | 1536089 | 1534911 | 1179        | 8-amino-7-oxononanoate synthase (EC 2.3.1.47)                                                        |                      |
| 1        | 2596823 | 2595957 | 867         | 3-ketoacyl-CoA thiolase (EC 2.3.1.16) @ Acetyl-CoA acetyltransferase (EC 2.3.1.9)                    |                      |
| 1        | 2597623 | 2597066 | 558         | Substrate-specific component BioY of biotin ECF transporter                                          |                      |
| 1        | 2597777 | 2599210 | 1434        | Long-chain-fatty-acid--CoA ligase (EC 6.2.1.3)                                                       |                      |
| 1        | 2671636 | 2670125 | 1512        | Long-chain-fatty-acid--CoA ligase (EC 6.2.1.3)                                                       |                      |
| 1        | 2750565 | 2749375 | 1191        | 3-ketoacyl-CoA thiolase (EC 2.3.1.16) @ Acetyl-CoA acetyltransferase (EC 2.3.1.9)                    |                      |
| 1        | 2764575 | 2762959 | 1617        | Long-chain-fatty-acid--CoA ligase (EC 6.2.1.3)                                                       |                      |
| 1        | 3517402 | 3515906 | 1497        | Long-chain-fatty-acid--CoA ligase (EC 6.2.1.3)                                                       |                      |
| 1        | 3814396 | 3813407 | 990         | Biotin operon repressor / Biotin--protein ligase (EC 6.3.4.9)(EC 6.3.4.10)(EC 6.3.4.11)(EC 6.3.4.15) |                      |

|   |         |         |      |                                                                          |                      |
|---|---------|---------|------|--------------------------------------------------------------------------|----------------------|
| 1 | 4397158 | 4395785 | 1374 | Adenosylmethionine-8-amino-7-oxononanoate aminotransferase (EC 2.6.1.62) |                      |
| 1 | 4398456 | 4397893 | 564  | Substrate-specific component BioY of biotin ECF transporter              |                      |
| 1 | 4614046 | 4612514 | 1533 | Long-chain-fatty-acid--CoA ligase (EC 6.2.1.3)                           |                      |
| 1 | 4684083 | 4684691 | 609  | Substrate-specific component BioY of biotin ECF transporter              |                      |
| 1 | 4762038 | 4761043 | 996  | Biotin synthase (EC 2.8.1.6)                                             |                      |
| 1 | 434741  | 433935  | 807  | Hydroxymethylpyrimidine ABC transporter, transmembrane component         | Thiamin biosynthesis |
| 1 | 435498  | 434728  | 771  | Hydroxymethylpyrimidine ABC transporter, ATPase component                |                      |
| 1 | 833784  | 835685  | 1902 | 1-deoxy-D-xylulose 5-phosphate synthase (EC 2.2.1.7)                     |                      |
| 1 | 1053946 | 1054593 | 648  | Thiamin pyrophosphokinase (EC 2.7.6.2)                                   |                      |
| 1 | 2556158 | 2556736 | 579  | Substrate-specific component ThiT of thiamin ECF transporter             |                      |
| 1 | 2856653 | 2855292 | 1362 | Predicted hydroxymethylpyrimidine transporter CytX                       |                      |
| 1 | 2958173 | 2957529 | 645  | Thiamin-phosphate pyrophosphorylase (EC 2.5.1.3)                         |                      |
| 1 | 2958993 | 2958187 | 807  | Hydroxyethylthiazole kinase (EC 2.7.1.50)                                |                      |
| 1 | 4337455 | 4336445 | 1011 | Hydroxymethylpyrimidine ABC transporter, substrate-binding component     |                      |
| 1 | 4338195 | 4337452 | 744  | Hydroxymethylpyrimidine ABC transporter, transmembrane component         |                      |
| 1 | 4338956 | 4338192 | 765  | Hydroxymethylpyrimidine ABC transporter, ATPase component                |                      |
| 1 | 4672948 | 4672745 | 204  | Sulfur carrier protein ThiS                                              |                      |
| 1 | 4674072 | 4672945 | 1128 | Glycine oxidase ThiO (EC 1.4.3.19)                                       |                      |



|   |         |         |      |                                                                                                |                                             |
|---|---------|---------|------|------------------------------------------------------------------------------------------------|---------------------------------------------|
| 1 | 411591  | 413012  | 1422 | Isochorismate synthase (EC 5.4.4.2) @ Menaquinone-specific isochorismate synthase (EC 5.4.4.2) | Menaquinone and Phylloquinone Biosynthesis, |
| 1 | 412999  | 414753  | 1755 | 2-succinyl-5-enolpyruvyl-6-hydroxy-3-cyclohexene-1-carboxylic-acid synthase (EC 2.2.1.9)       |                                             |
| 1 | 414757  | 415566  | 810  | 2-succinyl-6-hydroxy-2,4-cyclohexadiene-1-carboxylate synthase (EC 4.2.99.20)                  |                                             |
| 1 | 415583  | 416401  | 819  | Naphthoate synthase (EC 4.1.3.36)                                                              |                                             |
| 1 | 416484  | 417947  | 1464 | O-succinylbenzoic acid--CoA ligase (EC 6.2.1.26)                                               |                                             |
| 1 | 417951  | 419054  | 1104 | O-succinylbenzoate synthase (EC 4.2.1.113)                                                     |                                             |
| 1 | 2851852 | 2850929 | 924  | 1,4-dihydroxy-2-naphthoate polyprenyltransferase (EC 2.5.1.74)                                 |                                             |
| 1 | 4168867 | 4169976 | 1110 | N-acylamino acid racemase @ O-succinylbenzoate synthase (EC 4.2.1.113)                         |                                             |
| 1 | 253547  | 254554  | 1008 | NAD-dependent glyceraldehyde-3-phosphate dehydrogenase (EC 1.2.1.12)                           | Pyridoxin (Vitamin B6) Biosynthesis         |
| 1 | 325424  | 326194  | 771  | Hypothetical NagD-like phosphatase                                                             |                                             |
| 1 | 833784  | 835685  | 1902 | 1-deoxy-D-xylulose 5-phosphate synthase (EC 2.2.1.7)                                           |                                             |
| 1 | 923118  | 921544  | 1575 | D-3-phosphoglycerate dehydrogenase (EC 1.1.1.95)                                               |                                             |
| 1 | 1670039 | 1671004 | 966  | D-3-phosphoglycerate dehydrogenase (EC 1.1.1.95)                                               |                                             |
| 1 | 2704330 | 2703131 | 1200 | D-3-phosphoglycerate dehydrogenase (EC 1.1.1.95)                                               |                                             |
| 1 | 3049350 | 3048385 | 966  | D-3-phosphoglycerate dehydrogenase (EC 1.1.1.95)                                               |                                             |
| 1 | 3273613 | 3272603 | 1011 | 4-hydroxythreonine-4-phosphate dehydrogenase (EC 1.1.1.262)                                    |                                             |
| 1 | 4642166 | 4643263 | 1098 | Phosphoserine aminotransferase (EC 2.6.1.52)                                                   |                                             |
| 1 | 4842116 | 4841184 | 933  | D-3-phosphoglycerate dehydrogenase (EC 1.1.1.95)                                               |                                             |
| 1 | 635480  | 636778  | 1299 | Dihydrofolate synthase (EC 6.3.2.12) @ Folylpolyglutamate synthase (EC 6.3.2.17)               | Folate Biosynthesis,                        |

|   |         |         |      |                                                                                                                                         |
|---|---------|---------|------|-----------------------------------------------------------------------------------------------------------------------------------------|
| 1 | 792390  | 792956  | 567  | 5-formyltetrahydrofolate cyclo-ligase (EC 6.3.3.2)                                                                                      |
| 1 | 952150  | 952716  | 567  | GTP cyclohydrolase I (EC 3.5.4.16) type 1                                                                                               |
| 1 | 1238380 | 1239174 | 795  | Thymidylate synthase (EC 2.1.1.45)                                                                                                      |
| 1 | 1239171 | 1239656 | 486  | Dihydrofolate reductase (EC 1.5.1.3)                                                                                                    |
| 1 | 3037214 | 3036732 | 483  | transmembrane protein, distant homology with ydbS                                                                                       |
| 1 | 3811440 | 3811057 | 384  | Aspartate 1-decarboxylase (EC 4.1.1.11)                                                                                                 |
| 1 | 3812298 | 3811441 | 858  | Pantoate--beta-alanine ligase (EC 6.3.2.1)                                                                                              |
| 1 | 4150928 | 4150284 | 645  | GTP cyclohydrolase I (EC 3.5.4.16) type 1                                                                                               |
| 1 | 4404695 | 4403847 | 849  | Dihydropteroate synthase (EC 2.5.1.15)                                                                                                  |
| 1 | 5120004 | 5119459 | 546  | 2-amino-4-hydroxy-6-hydroxymethyldihydropteridine pyrophosphokinase (EC 2.7.6.3)                                                        |
| 1 | 5120364 | 5120005 | 360  | Dihydroneopterin aldolase (EC 4.1.2.25)                                                                                                 |
| 1 | 5121249 | 5120386 | 864  | Aminodeoxychorismate lyase (EC 4.1.3.38)                                                                                                |
| 1 | 5121835 | 5121254 | 582  | Para-aminobenzoate synthase, amidotransferase component (EC 2.6.1.85) @ Anthranilate synthase, amidotransferase component (EC 4.1.3.27) |
| 1 | 5123253 | 5121838 | 1416 | Para-aminobenzoate synthase, aminase component (EC 2.6.1.85)                                                                            |
| 1 | 5128912 | 5128373 | 540  | Hypoxanthine-guanine phosphoribosyltransferase (EC 2.4.2.8)                                                                             |
| 1 | 5130316 | 5128940 | 1377 | tRNA(Ile)-lysine synthetase (EC 6.3.4.19)                                                                                               |

#### Carbohydrates

| Contig | Start   | Stop    | Length (nt) | Function                                    | Subsystems          |
|--------|---------|---------|-------------|---------------------------------------------|---------------------|
| 1      | 1429499 | 1430977 | 1479        | Sucrose-6-phosphate hydrolase (EC 3.2.1.26) | Sucrose utilization |

|   |         |         |      |                                                                           |                                                 |
|---|---------|---------|------|---------------------------------------------------------------------------|-------------------------------------------------|
| 1 | 1922219 | 1923292 | 1074 | Sucrose operon repressor ScrR, LacI family                                |                                                 |
| 1 | 3033599 | 3032661 | 939  | Fructokinase (EC 2.7.1.4)                                                 |                                                 |
| 1 | 3621214 | 3617636 | 3579 | Sucrose-6-phosphate hydrolase (EC 3.2.1.26)                               |                                                 |
| 1 | 3633800 | 3632559 | 1242 | Sucrose permease, major facilitator superfamily                           |                                                 |
| 1 | 3634127 | 3635110 | 984  | Sucrose operon repressor ScrR, LacI family                                |                                                 |
| 1 | 4043879 | 4042902 | 978  | Fructokinase (EC 2.7.1.4)                                                 |                                                 |
| 1 | 3264389 | 3263334 | 1056 | Aldose 1-epimerase (EC 5.1.3.3)                                           | Lactose and Galactose<br>Uptake and Utilization |
| 1 | 3938481 | 3939248 | 768  | Galactose-1-phosphate uridylyltransferase (EC 2.7.7.10)                   |                                                 |
| 1 | 4126003 | 4125053 | 951  | UDP-glucose 4-epimerase (EC 5.1.3.2)                                      |                                                 |
| 1 | 4201829 | 4200849 | 981  | UDP-glucose 4-epimerase (EC 5.1.3.2)                                      |                                                 |
| 1 | 4539177 | 4537654 | 1524 | Galactose-1-phosphate uridylyltransferase (EC 2.7.7.10)                   |                                                 |
| 1 | 4540386 | 4539208 | 1179 | Galactokinase (EC 2.7.1.6)                                                |                                                 |
| 1 | 4955842 | 4954925 | 918  | UDP-glucose 4-epimerase (EC 5.1.3.2)                                      |                                                 |
| 1 | 4957396 | 4958286 | 891  | UDP-glucose 4-epimerase (EC 5.1.3.2)                                      |                                                 |
| 1 | 789670  | 791949  | 2280 | Mannose-1-phosphate guanylyltransferase / Phosphomannomutase (EC 5.4.2.8) | Mannose Metabolism                              |
| 1 | 1694801 | 1693590 | 1212 | D-mannose isomerase (EC 5.3.1.7)                                          |                                                 |
| 1 | 3341317 | 3341655 | 339  | Mannose-6-phosphate isomerase (EC 5.3.1.8)                                |                                                 |
| 1 | 2143196 | 2143939 | 744  | Epimerase KguE                                                            | 2-Ketogluconate Utilization                     |
| 1 | 2143936 | 2144895 | 960  | 2-ketogluconate kinase (EC 2.7.1.13)                                      |                                                 |
| 1 | 2144898 | 2146178 | 1281 | 2-ketogluconate transporter                                               |                                                 |

|   |         |         |      |                                                                                                     |                                                  |
|---|---------|---------|------|-----------------------------------------------------------------------------------------------------|--------------------------------------------------|
| 1 | 2146954 | 2147961 | 1008 | 2-ketogluconate utilization repressor PtxS                                                          |                                                  |
| 1 | 894849  | 896030  | 1182 | Phosphopentomutase (EC 5.4.2.7)                                                                     | Deoxyribose and<br>Deoxynucleoside<br>Catabolism |
| 1 | 896047  | 896877  | 831  | Purine nucleoside phosphorylase (EC 2.4.2.1) @ N-<br>Ribosylnicotinamide phosphorylase (EC 2.4.2.1) |                                                  |
| 1 | 1270059 | 1270763 | 705  | Purine nucleoside phosphorylase (EC 2.4.2.1)                                                        |                                                  |
| 1 | 2295878 | 2296828 | 951  | Deoxyribonucleoside regulator DeoR (transcriptional repressor)                                      |                                                  |
| 1 | 2297339 | 2298640 | 1302 | Pyrimidine-nucleoside phosphorylase (EC 2.4.2.2)                                                    |                                                  |
| 1 | 2298662 | 2299336 | 675  | Deoxyribose-phosphate aldolase (EC 4.1.2.4)                                                         |                                                  |
| 1 | 4307616 | 4306738 | 879  | Ribokinase (EC 2.7.1.15)                                                                            |                                                  |
| 1 | 93533   | 94945   | 1413 | 6-phosphogluconate dehydrogenase, decarboxylating (EC 1.1.1.44)                                     | D-gluconate and<br>ketogluconates<br>metabolism, |
| 1 | 1808925 | 1809710 | 786  | Glucose 1-dehydrogenase (EC 1.1.1.47)                                                               |                                                  |
| 1 | 1894883 | 1895776 | 894  | 6-phosphogluconate dehydrogenase, decarboxylating (EC 1.1.1.44)                                     |                                                  |
| 1 | 2143936 | 2144895 | 960  | 2-ketogluconate kinase (EC 2.7.1.13)                                                                |                                                  |
| 1 | 3866974 | 3866078 | 897  | 6-phosphogluconate dehydrogenase, decarboxylating (EC 1.1.1.44)                                     |                                                  |
| 1 | 4053713 | 4052355 | 1359 | Gluconate transporter family protein                                                                |                                                  |
| 1 | 4188763 | 4187978 | 786  | Glucose 1-dehydrogenase (EC 1.1.1.47)                                                               |                                                  |
| 1 | 4388192 | 4387407 | 786  | Glucose 1-dehydrogenase (EC 1.1.1.47)                                                               |                                                  |
| 1 | 4471081 | 4469753 | 1329 | Gluconate permease                                                                                  |                                                  |
| 1 | 4474697 | 4473156 | 1542 | Gluconokinase (EC 2.7.1.12)                                                                         |                                                  |
| 1 | 4475622 | 4474723 | 900  | 6-phosphogluconate dehydrogenase, decarboxylating (EC 1.1.1.44)                                     |                                                  |
| 1 | 132344  | 132988  | 645  | Transaldolase (EC 2.2.1.2)                                                                          | Fructose utilization,                            |

|   |         |         |      |                                                                           |                         |
|---|---------|---------|------|---------------------------------------------------------------------------|-------------------------|
| 1 | 1591734 | 1592414 | 681  | Transaldolase (EC 2.2.1.2)                                                |                         |
| 1 | 1895826 | 1896494 | 669  | Transaldolase (EC 2.2.1.2)                                                |                         |
| 1 | 2790910 | 2790239 | 672  | Transaldolase (EC 2.2.1.2)                                                |                         |
| 1 | 2986512 | 2985598 | 915  | 1-phosphofructokinase (EC 2.7.1.56)                                       |                         |
| 1 | 2987261 | 2986509 | 753  | Transcriptional repressor of the fructose operon, DeoR family             |                         |
| 1 | 3033599 | 3032661 | 939  | Fructokinase (EC 2.7.1.4)                                                 |                         |
| 1 | 3267030 | 3266362 | 669  | Transaldolase (EC 2.2.1.2)                                                |                         |
| 1 | 3895496 | 3893775 | 1722 | Phosphoenolpyruvate-protein phosphotransferase of PTS system (EC 2.7.3.9) |                         |
| 1 | 3895762 | 3895496 | 267  | Phosphotransferase system, phosphocarrier protein HPr                     |                         |
| 1 | 4043879 | 4042902 | 978  | Fructokinase (EC 2.7.1.4)                                                 |                         |
| 1 | 4307616 | 4306738 | 879  | Ribokinase (EC 2.7.1.15)                                                  | D-ribose utilization,   |
| 1 | 4308598 | 4307609 | 990  | Ribose operon repressor                                                   |                         |
| 1 | 3051485 | 3049977 | 1509 | Xylulose kinase (EC 2.7.1.17)                                             | Xylose utilization      |
| 1 | 3254513 | 3253092 | 1422 | D-xylose proton-symporter Xyle                                            | Xylose utilization      |
| 1 | 3256317 | 3254815 | 1503 | Xylulose kinase (EC 2.7.1.17)                                             | Xylose utilization      |
| 1 | 3257713 | 3256376 | 1338 | Xylose isomerase (EC 5.3.1.5)                                             | Xylose utilization      |
| 1 | 3257939 | 3259105 | 1167 | Xylose-responsive transcription regulator, ROK family                     | Xylose utilization      |
| 1 | 1653329 | 1654960 | 1632 | Ribulokinase (EC 2.7.1.16)                                                | L-Arabinose utilization |
| 1 | 1654954 | 1655652 | 699  | L-ribulose-5-phosphate 4-epimerase (EC 5.1.3.4)                           |                         |
| 1 | 1655682 | 1657106 | 1425 | L-arabinose isomerase (EC 5.3.1.4)                                        |                         |
| 1 | 1657252 | 1658631 | 1380 | Arabinose-proton symporter                                                |                         |

---

| Adhesion |         |         |             |                                                                                                                      |            |
|----------|---------|---------|-------------|----------------------------------------------------------------------------------------------------------------------|------------|
| Scaffold | Start   | Stop    | Length (nt) | Function                                                                                                             | Subsystems |
| 1        | 164583  | 165407  | 825         | Flagellar basal-body rod protein FlgF                                                                                | Flagellum  |
| 1        | 165431  | 166252  | 822         | Flagellar basal-body rod protein FlgG                                                                                |            |
| 1        | 191405  | 191872  | 468         | Flagellar biosynthesis protein FlgN                                                                                  |            |
| 1        | 191891  | 193414  | 1524        | Flagellar hook-associated protein FlgK                                                                               |            |
| 1        | 193417  | 194298  | 882         | Flagellar hook-associated protein FlgL                                                                               |            |
| 1        | 205363  | 205764  | 402         | Flagellar biosynthesis protein FliS                                                                                  |            |
| 1        | 250767  | 252077  | 1311        | RNA polymerase sigma-54 factor RpoN                                                                                  |            |
| 1        | 485042  | 485845  | 804         | Flagellar motor rotation protein MotA                                                                                |            |
| 1        | 485880  | 486491  | 612         | Flagellar motor rotation protein MotB                                                                                |            |
| 1        | 761386  | 762519  | 1134        | RNA polymerase sigma factor RpoD                                                                                     |            |
| 1        | 996121  | 998379  | 2259        | Cell division protein FtsI [Peptidoglycan synthetase] (EC 2.4.1.129)                                                 |            |
| 1        | 998449  | 1000365 | 1917        | Cell division protein FtsI [Peptidoglycan synthetase] (EC 2.4.1.129)<br>@ Sporulation peptidoglycan synthetase SpoVD |            |
| 1        | 1090716 | 1091105 | 390         | Flagellar basal-body rod protein FlgB                                                                                |            |
| 1        | 1091108 | 1091557 | 450         | Flagellar basal-body rod protein FlgC                                                                                |            |
| 1        | 1091570 | 1091860 | 291         | Flagellar hook-basal body complex protein FliE                                                                       |            |

|   |         |         |      |                                                    |
|---|---------|---------|------|----------------------------------------------------|
| 1 | 1091910 | 1093502 | 1593 | Flagellar M-ring protein FliF                      |
| 1 | 1093514 | 1094533 | 1020 | Flagellar motor switch protein FliG                |
| 1 | 1094526 | 1095314 | 789  | Flagellar assembly protein FliH                    |
| 1 | 1095289 | 1096602 | 1314 | Flagellum-specific ATP synthase FliI               |
| 1 | 1096605 | 1097048 | 444  | Flagellar protein FliJ                             |
| 1 | 1097058 | 1097690 | 633  | Flagellar protein FlbB                             |
| 1 | 1100345 | 1100773 | 429  | Flagellar basal-body rod modification protein FlgD |
| 1 | 1100799 | 1101593 | 795  | Flagellar hook protein FlgE                        |
| 1 | 1101623 | 1101838 | 216  | Flagellar protein FlbD                             |
| 1 | 1102294 | 1103295 | 1002 | Flagellar motor switch protein FliM                |
| 1 | 1103285 | 1104415 | 1131 | Flagellar motor switch protein FliN                |
| 1 | 1105497 | 1106165 | 669  | Flagellar biosynthesis protein FliP                |
| 1 | 1106176 | 1106445 | 270  | Flagellar biosynthesis protein FliQ                |
| 1 | 1106448 | 1107224 | 777  | Flagellar biosynthesis protein FliR                |
| 1 | 1107227 | 1108309 | 1083 | Flagellar biosynthesis protein FlhB                |
| 1 | 1108340 | 1110376 | 2037 | Flagellar biosynthesis protein FlhA                |
| 1 | 1110376 | 1111473 | 1098 | Flagellar biosynthesis protein FlhF                |
| 1 | 1111466 | 1112335 | 870  | Flagellar synthesis regulator FleN                 |
| 1 | 1116443 | 1117204 | 762  | RNA polymerase sigma factor for flagellar operon   |
| 1 | 3087545 | 3086712 | 834  | Flagellar motor rotation protein MotB              |

|   |         |         |      |                                                                  |                                                                                                                                        |
|---|---------|---------|------|------------------------------------------------------------------|----------------------------------------------------------------------------------------------------------------------------------------|
| 1 | 3088332 | 3087538 | 795  | Flagellar motor rotation protein MotA                            |                                                                                                                                        |
| 1 | 4142047 | 4141232 | 816  | Flagellin protein FlaA                                           |                                                                                                                                        |
| 1 | 4324925 | 4326262 | 1338 | RNA polymerase sigma-54 factor RpoN                              |                                                                                                                                        |
| 1 | 726275  | 725445  | 831  | Late competence protein ComER, proline oxidase (EC 1.5.1.2)      | - none -                                                                                                                               |
| 1 | 726372  | 727007  | 636  | Late competence protein ComEA, DNA receptor                      | - none -                                                                                                                               |
| 1 | 727098  | 727664  | 567  | dCMP deaminase (EC 3.5.4.12) @ Late competence protein ComEB     | - none -                                                                                                                               |
| 1 | 800238  | 801290  | 1053 | Late competence protein ComGA, access of DNA to ComEA            | - none -                                                                                                                               |
| 1 | 801281  | 802327  | 1047 | Late competence protein ComGB, access of DNA to ComEA            | - none -                                                                                                                               |
| 1 | 802342  | 802653  | 312  | Late competence protein ComGC, access of DNA to ComEA, FIG007487 | - none -                                                                                                                               |
| 1 | 802640  | 803077  | 438  | Late competence protein ComGD, access of DNA to ComEA, FIG012777 | - none -                                                                                                                               |
| 1 | 1036739 | 1035027 | 1713 | Fibronectin/fibrinogen-binding protein                           | - none -                                                                                                                               |
| 1 | 1316172 | 1317497 | 1326 | Purple acid phosphatase/fibronectin domain protein               | - none -                                                                                                                               |
| 1 | 3339882 | 3341099 | 1218 | Translation elongation factor Tu                                 | Mycobacterium virulence operon involved in protein synthesis (SSU ribosomal proteins),<br><br>Translation elongation factors bacterial |
| 1 | 5084846 | 5083656 | 1191 | Translation elongation factor Tu                                 | Mycobacterium virulence operon involved in protein synthesis (SSU ribosomal proteins),                                                 |



Translation elongation  
factors bacterial

|   |         |         |      |                                                  |
|---|---------|---------|------|--------------------------------------------------|
| 1 | 4996262 | 4994631 | 1632 | Heat shock protein 60 kDa family chaperone GroEL |
| 1 | 4977120 | 4977797 | 678  | Collagen triple helix repeat protein             |

---

- none -

- none -

Table S5. Comparison of assembly level, source, contig number, length, CDS number, rRNA number, and tRNA number of different *Lactococcus lactis* subsp. *lactis* in NCBI ([https://www.ncbi.nlm.nih.gov/datasets/genomes/?taxon=1360&utm\\_source=gquery&utm\\_medium=referral](https://www.ncbi.nlm.nih.gov/datasets/genomes/?taxon=1360&utm_source=gquery&utm_medium=referral)).

| Assembly Accession     | Assembly Level  | Source NCBI                                             | Source Given       | Contigs | Length  | CDS  | rRNA | tmRNA | tRNA |
|------------------------|-----------------|---------------------------------------------------------|--------------------|---------|---------|------|------|-------|------|
| This study             | Scaffold        | Nile tilapia                                            | Aquatic Animal     | 33      | 2501275 | 2395 | 7    | 1     | 53   |
| GCF_000006865.1        | Complete Genome | Not Given                                               | Not Given          | 1       | 2365589 | 2383 | 19   | 1     | 61   |
| GCF_000025045.1        | Complete Genome | mung bean                                               | Plant              | 2       | 2635654 | 2551 | 19   | 1     | 67   |
| GCF_000192705.1        | Complete Genome | Homo sapiens                                            | Human              | 6       | 2518737 | 2495 | 19   | 1     | 63   |
| GCF_000284735.1        | Contig          | Not Given                                               | Not Given          | 131     | 2511332 | 2521 | 4    | 1     | 43   |
| <b>GCF_000344575.1</b> | Complete Genome | Not Given                                               | Not Given          | 1       | 2421471 | 2285 | 19   | 1     | 64   |
| GCF_000348965.1        | Contig          | dairy                                                   | Food (Human)       | 71      | 2527313 | 2421 | 7    | 1     | 46   |
| GCF_000442845.1        | Contig          | Not Given                                               | Not Given          | 42      | 2700005 | 2692 | 9    | 1     | 55   |
| GCF_000447905.1        | Contig          | propagated starter culture used in cheese manufacturing | Food (Human)       | 143     | 2505069 | 2549 | 9    | 1     | 59   |
| GCF_000447985.1        | Contig          | propagated starter culture used in cheese manufacturing | Food (Human)       | 182     | 2550393 | 2561 | 10   | 1     | 58   |
| GCA_000478255.2        | Complete Genome | frozen peas                                             | Food (Human)       | 2       | 2592264 | 2513 | 19   | 1     | 69   |
| GCF_000479375.2        | Complete Genome | home-made koumiss                                       | Food (Human)       | 4       | 2595492 | 2610 | 19   | 1     | 61   |
| GCF_000488975.1        | Contig          | starter culture for dairy fermentation                  | Food (Human)       | 132     | 2599239 | 2632 | 7    | 1     | 53   |
| GCF_000493355.1        | Scaffold        | Not Given                                               | Not Given          | 56      | 2603548 | 2622 | 5    | 1     | 52   |
| <b>GCF_000703145.1</b> | Contig          | Cow rumen                                               | Terrestrial animal | 1       | 2480811 | 2469 | 19   | 1     | 66   |
| GCF_000721865.3        | Scaffold        | Dromedary milk                                          | Food (Human)       | 48      | 2338917 | 2269 | 1    | 1     | 40   |
| GCF_000786755.1        | Contig          | artisanal cheese                                        | Food (Human)       | 218     | 2576542 | 2549 | 3    | 1     | 21   |
| GCF_000807375.1        | Complete Genome | Fresh raw Milk                                          | Food (Human)       | 1       | 2488699 | 2438 | 19   | 1     | 63   |
| GCF_000835975.1        | Contig          | Not Given                                               | Not Given          | 88      | 2545792 | 2568 | 4    | 1     | 52   |
| <b>GCF_001437565.1</b> | Scaffold        | Not Given                                               | Not Given          | 45      | 2245449 | 2170 | 4    | 1     | 49   |
| GCF_001455265.1        | Contig          | cheese                                                  | Food (Human)       | 83      | 2573719 | 2584 | 9    | 1     | 56   |
| GCF_001456385.1        | Contig          | Dairy starter                                           | Food (Human)       | 171     | 2547291 | 2503 | 10   | 1     | 53   |
| <b>GCF_001456455.1</b> | Contig          | Silage                                                  | Food (Animal)      | 46      | 2375664 | 2259 | 7    | 1     | 55   |
| GCF_001456475.1        | Contig          | White kimchii                                           | Food (Human)       | 60      | 2336037 | 2243 | 7    | 1     | 52   |
| GCF_001456495.1        | Contig          | Alfalfa sprouts                                         | Plant              | 54      | 2366759 | 2297 | 6    | 1     | 57   |
| GCF_001456505.1        | Contig          | Alfalfa sprouts                                         | Plant              | 192     | 2619218 | 2616 | 7    | 1     | 56   |
| <b>GCF_001456525.1</b> | Contig          | White kimchii                                           | Food (Human)       | 61      | 2445522 | 2367 | 7    | 1     | 57   |
| GCF_001456545.1        | Contig          | Grapefruit juice                                        | Food (Human)       | 110     | 2684299 | 2620 | 6    | 1     | 58   |

|                        |                 |                               |                |     |         |      |    |   |    |
|------------------------|-----------------|-------------------------------|----------------|-----|---------|------|----|---|----|
| GCF_001456575.1        | Contig          | Alfalfa and radish sprouts    | Plant          | 44  | 2574519 | 2492 | 6  | 1 | 57 |
| GCF_001456595.1        | Contig          | Japanese kaiware shoots       | Plant          | 38  | 2445893 | 2344 | 6  | 1 | 53 |
| <b>GCF_001456615.1</b> | Contig          | Mustard and cress             | Plant          | 98  | 2651253 | 2557 | 7  | 1 | 52 |
| <b>GCF_001456655.1</b> | Contig          | Chinese radish seeds          | Plant          | 48  | 2477489 | 2391 | 6  | 1 | 50 |
| GCF_001456675.1        | Contig          | Frozen peas                   | Food (Human)   | 133 | 2488400 | 2427 | 6  | 1 | 58 |
| GCF_001456685.1        | Contig          | Frozen peas                   | Food (Human)   | 227 | 2707537 | 2722 | 7  | 1 | 57 |
| GCF_001456695.1        | Contig          | bovine milk                   | Food (Human)   | 225 | 2410930 | 2385 | 7  | 1 | 50 |
| GCF_001456725.1        | Contig          | Alfalfa and radish sprouts    | Plant          | 33  | 2463397 | 2360 | 6  | 1 | 61 |
| <b>GCF_001456755.1</b> | Contig          | Sliced mixed vegetables       | Food (Human)   | 62  | 2376387 | 2281 | 6  | 1 | 52 |
| GCF_001456775.1        | Contig          | Grass                         | Plant          | 75  | 2475932 | 2371 | 6  | 1 | 55 |
| <b>GCF_001456785.1</b> | Contig          | soil                          | Soil           | 149 | 2674319 | 2617 | 7  | 1 | 55 |
| GCF_001456795.1        | Contig          | Dairy starter                 | Food (Human)   | 264 | 2521873 | 2480 | 6  | 1 | 51 |
| GCF_001456835.1        | Contig          | Soil and grass                | Soil           | 169 | 2743919 | 2691 | 6  | 1 | 54 |
| GCF_001456855.1        | Contig          | Dairy starter                 | Food (Human)   | 213 | 2498421 | 2475 | 6  | 1 | 51 |
| GCF_001456865.1        | Contig          | Dairy starter                 | Food (Human)   | 198 | 2473055 | 2423 | 6  | 1 | 53 |
| GCF_001514475.1        | Contig          | Not Given                     | Not Given      | 40  | 2547623 | 2549 | 4  | 1 | 45 |
| GCF_001622235.1        | Contig          | Dairy starter                 | Food (Human)   | 253 | 2457554 | 2414 | 7  | 1 | 52 |
| GCF_001984785.1        | Contig          | starter culture               | Food (Human)   | 41  | 2260841 | 2253 | 6  | 1 | 52 |
| GCF_002078415.1        | Complete Genome | Dairy fermentation            | Food (Human)   | 6   | 2634132 | 2666 | 16 | 1 | 57 |
| GCF_002078435.1        | Complete Genome | Dairy fermentation            | Food (Human)   | 5   | 2753892 | 2738 | 19 | 1 | 61 |
| GCF_002078475.2        | Complete Genome | Fermented Meat Product        | Food (Human)   | 7   | 2538171 | 2434 | 19 | 1 | 63 |
| GCF_002078495.1        | Complete Genome | Dairy fermentation            | Food (Human)   | 6   | 2542029 | 2539 | 19 | 1 | 61 |
| GCF_002078615.1        | Complete Genome | Dairy fermentation            | Food (Human)   | 3   | 2607675 | 2636 | 22 | 1 | 69 |
| GCF_002078855.1        | Complete Genome | Dairy fermentation            | Food (Human)   | 4   | 2459217 | 2475 | 18 | 1 | 60 |
| GCF_002078975.2        | Complete Genome | Dairy fermentation            | Food (Human)   | 4   | 2680416 | 2613 | 19 | 1 | 67 |
| GCF_002078995.2        | Complete Genome | Fermented Meat Product        | Food (Human)   | 6   | 2548507 | 2462 | 19 | 1 | 63 |
| GCF_002148215.1        | Complete Genome | 10 weeks old Samso 45+ cheese | Food (Human)   | 8   | 2509249 | 2512 | 19 | 1 | 62 |
| <b>GCF_002286195.1</b> | Complete Genome | marine fish gut               | Aquatic Animal | 3   | 2511408 | 2480 | 19 | 1 | 67 |
| GCF_002441815.1        | Contig          | Not Given                     | Not Given      | 76  | 2463410 | 2434 | 4  | 1 | 39 |
| GCF_002563615.1        | Scaffold        | cheese                        | Food (Human)   | 151 | 2553575 | 2541 | 4  | 1 | 51 |
| GCF_002804185.1        | Complete Genome | Not Given                     | Not Given      | 1   | 2432058 | 2298 | 16 | 1 | 53 |
| GCF_002804285.1        | Complete Genome | Not Given                     | Not Given      | 1   | 2414663 | 2285 | 17 | 1 | 62 |

|                        |                 |                                                                                      |                |     |         |      |    |    |    |
|------------------------|-----------------|--------------------------------------------------------------------------------------|----------------|-----|---------|------|----|----|----|
| <b>GCF_002866835.1</b> | Contig          | olive flounder                                                                       | Aquatic Animal | 3   | 2511408 | 2480 | 19 | 1  | 67 |
| <b>GCF_002895225.1</b> | Complete Genome | Napier grass                                                                         | Plant          | 1   | 2346663 | 2232 | 19 | 1  | 66 |
| <b>GCF_003176835.1</b> | Complete Genome | almond drupe                                                                         | Plant          | 2   | 2639081 | 2583 | 19 | 1  | 68 |
| GCF_003594665.1        | Contig          | Not Given                                                                            | Not Given      | 25  | 2439471 | 2371 | 5  | 1  | 52 |
| GCF_003627395.2        | Complete Genome | butter starter                                                                       | Food (Human)   | 7   | 2702171 | 2758 | 19 | 1  | 63 |
| GCF_003627415.1        | Contig          | butter starter                                                                       | Food (Human)   | 4   | 2526633 | 2581 | 19 | 1  | 62 |
| GCF_004354485.1        | Scaffold        | Not Given                                                                            | Not Given      | 82  | 2627820 | 2600 | 25 | 1  | 64 |
| GCF_005864305.1        | Contig          | goat milk                                                                            | Food (Human)   | 49  | 2757319 | 2792 | 10 | 1  | 58 |
| <b>GCF_006351065.1</b> | Contig          | Green peas                                                                           | Plant          | 41  | 2491705 | 2387 | 7  | 1  | 51 |
| GCF_006538925.1        | Contig          | Not Given                                                                            | Not Given      | 117 | 2436717 | 2421 | 4  | 1  | 38 |
| GCF_008180075.1        | Contig          | 3-day-old traditional semihard cheese made from mixed cow (20%) and sheep (80%) milk | Food (Human)   | 123 | 2655682 | 2643 | 7  | 1  | 51 |
| GCF_008728875.1        | Complete Genome | Not Given                                                                            | Not Given      | 11  | 2636203 | 2628 | 19 | 1  | 62 |
| GCF_009661795.1        | Contig          | Not Given                                                                            | Not Given      | 113 | 2592713 | 2617 | 7  | 1  | 53 |
| GCF_009661965.1        | Contig          | Not Given                                                                            | Not Given      | 104 | 2392814 | 2385 | 7  | 1  | 51 |
| GCF_009662035.1        | Contig          | Not Given                                                                            | Not Given      | 140 | 2519952 | 2530 | 7  | 1  | 49 |
| GCF_009662055.1        | Contig          | Not Given                                                                            | Not Given      | 68  | 2298370 | 2306 | 7  | 1  | 50 |
| GCF_009662075.1        | Contig          | Not Given                                                                            | Not Given      | 104 | 2412036 | 2400 | 7  | 1  | 50 |
| GCF_009662085.1        | Contig          | Not Given                                                                            | Not Given      | 53  | 2259999 | 2251 | 7  | 1  | 51 |
| GCF_009663915.1        | Contig          | dairy                                                                                | Food (Human)   | 120 | 2445329 | 2440 | 4  | 1  | 52 |
| GCF_009663925.1        | Contig          | dairy                                                                                | Food (Human)   | 130 | 2552877 | 2558 | 5  | 1  | 52 |
| GCF_009663935.1        | Contig          | Not Given                                                                            | Not Given      | 132 | 2553867 | 2563 | 4  | 1  | 52 |
| GCF_009885055.1        | Scaffold        | Not Given                                                                            | Not Given      | 91  | 2424658 | 2387 | 4  | 1  | 52 |
| GCF_013249195.1        | Contig          | Dairy product                                                                        | Food (Human)   | 106 | 2589822 | 2562 | 7  | 1  | 52 |
| GCF_013395015.3        | Complete Genome | farm kitchen                                                                         | Environment    | 5   | 2706818 | 2790 | 65 | 19 | 1  |
| GCF_015714805.1        | Contig          | Ethiopian Ergo                                                                       | Food (Human)   | 148 | 2669227 | 2636 | 4  | 1  | 49 |
| GCF_016921015.1        | Complete Genome | Dairy Fermentation                                                                   | Food (Human)   | 7   | 2530852 | 2553 | 19 | 1  | 63 |
| GCF_016952955.1        | Complete Genome | Dairy Fermentation                                                                   | Food (Human)   | 6   | 2611387 | 2650 | 19 | 1  | 63 |
| GCF_017821195.1        | Complete Genome | Dairy                                                                                | Food (Human)   | 8   | 2618227 | 2639 | 16 | 1  | 59 |
| GCF_017869415.1        | Complete Genome | dairy                                                                                | Food (Human)   | 1   | 2409036 | 2377 | 19 | 1  | 62 |
| GCF_018195735.1        | Contig          | milk camel                                                                           | Food (Human)   | 34  | 2513815 | 2445 | 7  | 1  | 55 |
| GCF_018195745.1        | Contig          | milk camel                                                                           | Food (Human)   | 118 | 2872551 | 2874 | 7  | 1  | 53 |
| GCF_018195775.1        | Contig          | milk camel                                                                           | Food (Human)   | 36  | 2514212 | 2444 | 7  | 1  | 55 |

|                 |                 |                               |              |     |         |      |    |   |    |
|-----------------|-----------------|-------------------------------|--------------|-----|---------|------|----|---|----|
| GCF_018195795.1 | Contig          | milk camel                    | Food (Human) | 115 | 2815350 | 2816 | 7  | 1 | 53 |
| GCF_018195805.1 | Contig          | milk camel                    | Food (Human) | 38  | 2513704 | 2443 | 7  | 1 | 55 |
| GCF_018195835.1 | Contig          | milk camel                    | Food (Human) | 114 | 2814330 | 2816 | 7  | 1 | 53 |
| GCF_018320725.1 | Contig          | fermented buffalo milk, Dadih | Food (Human) | 55  | 2441808 | 2383 | 4  | 1 | 48 |
| GCF_900088425.1 | Complete Genome | Not Given                     | Not Given    | 5   | 2730625 | 2658 | 19 | 1 | 64 |
| GCF_900291885.1 | Contig          | Not Given                     | Not Given    | 78  | 2613255 | 2633 | 12 | 1 | 66 |
| GCF_900291895.1 | Contig          | Not Given                     | Not Given    | 78  | 2575082 | 2582 | 8  | 1 | 54 |

Table S6. Comparison of assembly level, source, contig number, length, CDS number, rRNA number, and tRNA number of different *Priestia megaterium* genomes in NCBI. (<https://www.ncbi.nlm.nih.gov/datasets/genomes/?taxon=1404>).

| Assembly Accession     | Assembly Level  | Source                                       | Source given   | Contig | Length  | CDS  | rRNA | tmRNA | tRNA |
|------------------------|-----------------|----------------------------------------------|----------------|--------|---------|------|------|-------|------|
| This study             | Scaffold        | Nile tilapia                                 | Aquatic animal | 94     | 5485864 | 5576 | 23   | 1     | 142  |
| GCF_000025805.1        | Complete Genome | Not Given                                    | Not Given      | 1      | 5097447 | 5191 | 33   | 1     | 115  |
| GCF_000025825.1        | Complete Genome | Not Given                                    | Not Given      | 8      | 5523192 | 5596 | 37   | 1     | 137  |
| GCF_000225265.1        | Complete Genome | Not Given                                    | Not Given      | 4      | 5075293 | 5209 | 33   | 1     | 117  |
| GCF_000334875.3        | Complete Genome | contaminated soil                            | Environmental  | 11     | 5883957 | 5955 | 53   | 1     | 140  |
| GCF_000480335.1        | Scaffold        | salt crystallizer of the Rann of Kutch       | Salt           | 140    | 4369029 | 4116 | 4    | 1     | 56   |
| GCF_000527015.1        | Contig          | Not Given                                    | Not Given      | 47     | 5460379 | 5572 | 6    | 1     | 62   |
| GCF_000746935.1        | Scaffold        | Not Given                                    | Not Given      | 5      | 5620959 | 5742 | 21   | 1     | 111  |
| GCF_000764085.1        | Contig          | Not Given                                    | Not Given      | 78     | 5727066 | 5866 | 18   | 1     | 58   |
| GCF_000832985.1        | Complete Genome | environmental sample                         | Environmental  | 7      | 5746640 | 5858 | 41   | 1     | 122  |
| GCF_000876465.1        | Contig          | submerged soil sample, rice field            | Environmental  | 49     | 5543117 | 5684 | 13   | 1     | 94   |
| GCF_001029885.1        | Contig          | Chamaecostus cuspidatus internal stem tissue | Plant          | 240    | 5864214 | 5946 | 21   | 1     | 148  |
| GCF_001050455.1        | Complete Genome | Not Given                                    | Not Given      | 2      | 5229799 | 5264 | 42   | 1     | 130  |
| <b>GCF_001238505.1</b> | Contig          | Soil                                         | Environmental  | 194    | 5669134 | 5750 | 4    | 1     | 98   |
| <b>GCF_001541965.1</b> | Contig          | Waltherarndtia caliculatum White Sands Reef  | Aquatic Animal | 167    | 5435297 | 5521 | 15   | 1     | 144  |
| GCF_001591525.1        | Contig          | Not Given                                    | Not Given      | 50     | 5513953 | 5663 | 10   | 1     | 84   |
| GCF_001593805.1        | Scaffold        | bar-headed goose                             | Bird           | 78     | 6247384 | 6413 | 5    | 1     | 116  |
| GCF_001640745.1        | Contig          | human gut microbiota                         | Human          | 12     | 5051644 | 5213 | 16   | 1     | 107  |
| GCF_001937775.1        | Contig          | lake water                                   | Environmental  | 87     | 5974410 | 6087 | 26   | 1     | 151  |
| GCF_002009195.1        | Complete Genome | Camellia oleifera                            | Plant          | 8      | 5610875 | 5816 | 44   | 1     | 119  |
| GCF_002276335.1        | Contig          | uncut heroin sample                          | Drug           | 348    | 5781865 | 5825 | 3    | 1     | 28   |
| GCF_002550995.1        | Scaffold        | soil                                         | Environmental  | 151    | 6082026 | 6185 | 6    | 1     | 77   |
| GCF_002551875.1        | Scaffold        | soil                                         | Environmental  | 138    | 6018513 | 6158 | 4    | 1     | 69   |
| GCF_002552135.1        | Scaffold        | root Soybean                                 | Plant          | 47     | 5439139 | 5564 | 4    | 1     | 94   |
| GCF_002552565.1        | Contig          | Wheat                                        | Plant          | 51     | 5321764 | 5467 | 3    | 1     | 88   |
| GCF_002552835.1        | Scaffold        | soil                                         | Environmental  | 161    | 6092226 | 6214 | 5    | 1     | 64   |
| GCF_002552955.1        | Scaffold        | soil                                         | Environmental  | 136    | 5990546 | 6124 | 4    | 1     | 77   |
| GCF_002557935.1        | Scaffold        | root Corn                                    | Plant          | 121    | 5898346 | 6068 | 3    | 1     | 72   |

|                        |          |                |               |     |         |      |   |   |    |
|------------------------|----------|----------------|---------------|-----|---------|------|---|---|----|
| <b>GCF_002558155.1</b> | Contig   | Grass          | Plant         | 64  | 5315331 | 5420 | 4 | 1 | 96 |
| GCF_002558805.1        | Scaffold | root Corn      | Plant         | 127 | 5973872 | 6111 | 4 | 1 | 82 |
| GCF_002559285.1        | Scaffold | root Corn      | Plant         | 76  | 5752868 | 5886 | 5 | 1 | 93 |
| GCF_002559335.1        | Scaffold | soil           | Environmental | 58  | 5824724 | 5972 | 4 | 1 | 84 |
| GCF_002559475.1        | Scaffold | root Soybean   | Plant         | 55  | 5891653 | 6013 | 4 | 1 | 86 |
| <b>GCF_002560595.1</b> | Scaffold | Corn           | Plant         | 36  | 5130959 | 5179 | 4 | 1 | 79 |
| GCF_002560705.1        | Scaffold | root Corn      | Plant         | 102 | 5873408 | 5970 | 3 | 1 | 78 |
| <b>GCF_002561015.1</b> | Scaffold | root Corn      | Plant         | 43  | 5430055 | 5529 | 4 | 1 | 86 |
| GCF_002561125.1        | Scaffold | Grass          | Plant         | 75  | 5933109 | 6101 | 4 | 1 | 73 |
| GCF_002561515.1        | Scaffold | root Cotton    | Plant         | 118 | 5630529 | 5740 | 4 | 1 | 79 |
| GCF_002562195.1        | Scaffold | Grass          | Plant         | 54  | 5736173 | 5877 | 4 | 1 | 64 |
| GCF_002562515.1        | Scaffold | soil           | Environmental | 82  | 5757646 | 5876 | 5 | 1 | 77 |
| <b>GCF_002564705.1</b> | Scaffold | root Corn      | Plant         | 60  | 5426973 | 5508 | 3 | 1 | 78 |
| GCF_002564755.1        | Scaffold | soil           | Environmental | 166 | 6050940 | 6236 | 4 | 1 | 86 |
| GCF_002565155.1        | Scaffold | root Corn      | Plant         | 76  | 5858387 | 5975 | 3 | 1 | 81 |
| GCF_002565335.1        | Scaffold | soil           | Environmental | 104 | 6003007 | 6107 | 4 | 1 | 81 |
| GCF_002565535.1        | Scaffold | root Soybean   | Plant         | 41  | 5688351 | 5812 | 4 | 1 | 78 |
| GCF_002566025.1        | Scaffold | soil           | Environmental | 95  | 5940000 | 6055 | 4 | 1 | 82 |
| GCF_002566035.1        | Scaffold | Corn           | Plant         | 250 | 6065517 | 6189 | 5 | 1 | 56 |
| GCF_002566285.1        | Scaffold | root Corn      | Plant         | 136 | 6022330 | 6127 | 4 | 1 | 69 |
| <b>GCF_002566345.1</b> | Scaffold | root Corn      | Plant         | 55  | 5550488 | 5679 | 6 | 1 | 97 |
| GCF_002566435.1        | Scaffold | root Soybean   | Plant         | 53  | 5815091 | 5970 | 4 | 1 | 68 |
| GCF_002566965.1        | Scaffold | vegetable core | Plant         | 98  | 5915645 | 6046 | 5 | 1 | 90 |
| GCF_002566985.1        | Scaffold | root Corn      | Plant         | 74  | 6060134 | 6208 | 3 | 1 | 63 |
| GCF_002567045.1        | Scaffold | core Grass     | Plant         | 92  | 5784293 | 5938 | 4 | 1 | 75 |
| GCF_002567075.1        | Scaffold | soil           | Environmental | 124 | 5862733 | 6035 | 3 | 1 | 81 |
| <b>GCF_002567645.1</b> | Scaffold | plant root     | Plant         | 86  | 5325730 | 5422 | 4 | 1 | 91 |
| GCF_002568195.1        | Scaffold | plant root     | Plant         | 83  | 5361395 | 5525 | 4 | 1 | 80 |
| GCF_002568305.1        | Scaffold | root Corn      | Plant         | 58  | 5851041 | 5955 | 3 | 1 | 70 |
| GCF_002570645.1        | Scaffold | root Corn      | Plant         | 60  | 5854016 | 5963 | 4 | 1 | 81 |
| <b>GCF_002570715.1</b> | Scaffold | core Corn      | Plant         | 60  | 5429875 | 5541 | 4 | 1 | 93 |
| GCF_002571125.1        | Scaffold | root Corn      | Plant         | 80  | 5968560 | 6083 | 4 | 1 | 85 |

|                        |                 |                                 |               |     |         |      |    |   |     |
|------------------------|-----------------|---------------------------------|---------------|-----|---------|------|----|---|-----|
| GCF_002574105.1        | Scaffold        | root Corn                       | Plant         | 54  | 5846869 | 6005 | 4  | 1 | 88  |
| <b>GCF_002574795.1</b> | Scaffold        | plant root                      | Plant         | 78  | 5502575 | 5561 | 5  | 1 | 88  |
| GCF_002574835.1        | Scaffold        | soil                            | Environmental | 76  | 7057766 | 7417 | 4  | 1 | 91  |
| GCF_002575285.1        | Scaffold        | vegetable core                  | Environmental | 88  | 5888189 | 6016 | 3  | 1 | 79  |
| GCF_002575465.1        | Scaffold        | root Corn                       | Plant         | 81  | 6114345 | 6270 | 5  | 1 | 73  |
| GCF_002575685.1        | Scaffold        | root Corn                       | Plant         | 42  | 5643538 | 5781 | 4  | 1 | 73  |
| GCF_002575735.1        | Scaffold        | soil                            | Environmental | 112 | 6099229 | 6298 | 3  | 1 | 86  |
| GCF_002576235.1        | Scaffold        | core Corn                       | Plant         | 100 | 6002747 | 6164 | 3  | 1 | 85  |
| GCF_002576315.1        | Scaffold        | core Grass                      | Plant         | 72  | 5818223 | 5967 | 4  | 1 | 76  |
| GCF_002576505.1        | Scaffold        | root Soybean                    | Plant         | 67  | 6017010 | 6104 | 3  | 1 | 75  |
| <b>GCF_002576935.1</b> | Scaffold        | soil                            | Environmental | 150 | 5127880 | 5245 | 4  | 1 | 79  |
| GCF_002577015.1        | Scaffold        | core Corn                       | Plant         | 109 | 6060373 | 6201 | 5  | 1 | 84  |
| GCF_002577035.1        | Scaffold        | soil                            | Environmental | 66  | 5784810 | 5918 | 4  | 1 | 82  |
| GCF_002577555.1        | Scaffold        | core Grass                      | Plant         | 96  | 6067869 | 6176 | 4  | 1 | 63  |
| GCF_002577645.1        | Scaffold        | core Corn                       | Plant         | 68  | 5973353 | 6077 | 4  | 1 | 103 |
| GCF_002583135.1        | Scaffold        | soil                            | Environmental | 106 | 5926154 | 6028 | 4  | 1 | 78  |
| GCF_002584405.1        | Scaffold        | root Corn                       | Plant         | 91  | 5955022 | 6066 | 4  | 1 | 87  |
| GCF_002585805.1        | Scaffold        | root Corn                       | Plant         | 66  | 5872152 | 5986 | 3  | 1 | 77  |
| <b>GCF_002586045.1</b> | Scaffold        | Soil                            | Environmental | 39  | 5190353 | 5284 | 3  | 1 | 72  |
| GCF_002586445.1        | Scaffold        | Soil                            | Environmental | 129 | 5932001 | 6041 | 3  | 1 | 71  |
| <b>GCF_002871835.1</b> | Scaffold        | Homo sapiens                    | Human         | 16  | 5254734 | 5319 | 12 | 1 | 74  |
| GCA_002872495.3        | Chromosome      | Soil                            | Environmental | 2   | 5121099 | 5237 | 10 | 1 | 73  |
| <b>GCF_002888675.1</b> | Contig          | stored rice grains              | Plant         | 98  | 5022643 | 5110 | 19 | 1 | 100 |
| GCF_003072605.2        | Complete Genome | Rhizosphere Sporobolus anglicus | Plant         | 5   | 5432127 | 5430 | 42 | 1 | 130 |
| GCF_003074515.1        | Contig          | Rhizosphere Sporobolus anglicus | Plant         | 36  | 5475756 | 5570 | 54 | 1 | 164 |
| GCF_003075235.1        | Contig          | Bioreactor                      | Not Given     | 16  | 5071852 | 5165 | 28 | 1 | 118 |
| GCF_003075275.1        | Contig          | Bioreactor                      | Not Given     | 32  | 5081950 | 5183 | 25 | 1 | 100 |
| GCF_003075295.1        | Contig          | Bioreactor                      | Not Given     | 28  | 5084955 | 5175 | 32 | 1 | 121 |
| GCF_003075355.1        | Contig          | Bioreactor                      | Not Given     | 69  | 5089878 | 5191 | 22 | 1 | 104 |
| GCF_003382345.1        | Scaffold        | Soil                            | Environmental | 114 | 5920616 | 6125 | 9  | 1 | 87  |
| GCF_003688675.1        | Scaffold        | Not Given                       | Not Given     | 13  | 4937440 | 5023 | 10 | 1 | 72  |



|                        |                 |                                                       |               |      |         |      |    |   |     |
|------------------------|-----------------|-------------------------------------------------------|---------------|------|---------|------|----|---|-----|
| GCF_004150295.1        | Contig          | Clay soil high temperatures around 45 celsius degrees | Environmental | 247  | 5572365 | 5634 | 18 | 1 | 132 |
| GCF_004803605.1        | Contig          | fermented food                                        | Food (Human)  | 101  | 5596120 | 5719 | 8  | 1 | 82  |
| <b>GCF_005048835.1</b> | Contig          | Soil                                                  | Environmental | 47   | 5501316 | 5598 | 13 | 1 | 97  |
| GCF_005491525.1        | Chromosome      | Air                                                   | Environmental | 8    | 5497494 | 5587 | 34 | 1 | 130 |
| GCF_006094495.1        | Complete Genome | Not Given                                             | Not Given     | 7    | 5746548 | 5851 | 41 | 1 | 120 |
| GCF_006385935.1        | Complete Genome | Soil                                                  | Environmental | 6    | 5712573 | 5808 | 43 | 1 | 137 |
| GCF_006454485.1        | Scaffold        | silkworm excrement                                    | Insect        | 29   | 5319455 | 5521 | 1  | 1 | 44  |
| GCF_006455245.1        | Scaffold        | silkworm excrement                                    | Insect        | 36   | 5323602 | 5524 | 1  | 1 | 48  |
| <b>GCF_006716955.1</b> | Scaffold        | Not Given                                             | Not Given     | 16   | 5388835 | 5517 | 11 | 1 | 90  |
| GCF_007672525.1        | Scaffold        | environmental sample                                  | Environmental | 626  | 5520005 | 5604 | 4  | 1 | 50  |
| GCF_007672925.1        | Scaffold        | environmental sample                                  | Environmental | 62   | 5271307 | 5378 | 4  | 1 | 50  |
| GCF_007673295.1        | Scaffold        | environmental sample                                  | Environmental | 1008 | 5503411 | 5516 | 4  | 1 | 46  |
| GCF_007674025.1        | Scaffold        | environmental sample                                  | Environmental | 136  | 5418958 | 5537 | 5  | 1 | 47  |
| GCF_007674145.1        | Scaffold        | environmental sample                                  | Environmental | 88   | 5649004 | 5735 | 7  | 1 | 46  |
| GCF_007677165.1        | Scaffold        | environmental sample                                  | Environmental | 110  | 5248653 | 5369 | 4  | 1 | 40  |
| GCF_007678145.1        | Scaffold        | environmental sample                                  | Environmental | 63   | 5364424 | 5535 | 5  | 1 | 82  |
| GCF_007678435.1        | Scaffold        | environmental sample                                  | Environmental | 119  | 5787672 | 5906 | 6  | 1 | 50  |
| GCF_007923065.1        | Chromosome      | sludge                                                | Environmental | 1    | 5072144 | 5162 | 11 | 1 | 102 |
| GCF_007923105.1        | Chromosome      | sludge                                                | Environmental | 1    | 6169081 | 6313 | 9  | 1 | 106 |
| GCF_008693225.1        | Scaffold        | horsechestnut trunk                                   | Plant         | 105  | 5133407 | 5246 | 5  | 1 | 71  |
| GCF_009497655.1        | Complete Genome | plant                                                 | Plant         | 3    | 5243446 | 5303 | 27 | 1 | 119 |
| GCF_009728545.1        | Contig          | Retama monosperma root nodules                        | Plant         | 81   | 5817483 | 5818 | 21 | 1 | 118 |
| GCF_009911775.1        | Complete Genome | farmland                                              | Environmental | 1    | 5171845 | 5242 | 40 | 1 | 118 |
| GCF_009935415.1        | Scaffold        | Commercial Probiotic                                  | Not Given     | 28   | 5600120 | 5721 | 3  | 1 | 65  |
| GCF_010178635.1        | Contig          | spacecraft hardware                                   | Other         | 12   | 5761571 | 5940 | 49 | 1 | 147 |
| GCF_011058275.1        | Complete Genome | soil                                                  | Environmental | 2    | 5407472 | 5486 | 37 | 1 | 118 |
| GCF_012275205.1        | Complete Genome | Not Given                                             | Not Given     | 1    | 6468885 | 6177 | 63 | 1 | 149 |
| GCF_012641205.1        | Contig          | Sapindus                                              | Plant         | 62   | 5102251 | 5195 | 15 | 1 | 95  |
| GCF_012926555.1        | Contig          | Not Given                                             | Not Given     | 196  | 5429269 | 5535 | 19 | 1 | 105 |
| GCF_013146705.1        | Complete Genome | Paper surface                                         | Environmental | 10   | 6872701 | 7089 | 47 | 1 | 125 |
| GCF_013375615.1        | Contig          | Zea mays                                              | Plant         | 104  | 6160258 | 6323 | 1  | 1 | 61  |
| GCF_013389435.1        | Complete Genome | potash salt dump                                      | Environmental | 10   | 5984922 | 6061 | 47 | 1 | 153 |

|                        |                 |                                                        |               |     |         |      |    |   |     |
|------------------------|-----------------|--------------------------------------------------------|---------------|-----|---------|------|----|---|-----|
| GCF_013458535.1        | Complete Genome | agricultural soil                                      | Environmental | 10  | 6165405 | 6231 | 47 | 1 | 158 |
| GCF_014839485.1        | Contig          | Phaseolus vulgaris seed                                | Plant         | 32  | 5775775 | 5892 | 17 | 1 | 126 |
| GCF_014842705.1        | Contig          | Phaseolus vulgaris seed                                | Plant         | 57  | 6069910 | 6202 | 18 | 1 | 121 |
| GCF_014892475.1        | Scaffold        | soil sample (organo-mineral particles) near a borehole | Environmental | 122 | 6183957 | 6371 | 4  | 1 | 53  |
| GCF_015354485.1        | Contig          | Endophyte                                              | Plant         | 54  | 6086124 | 6206 | 19 | 1 | 152 |
| <b>GCF_015582655.1</b> | Complete Genome | Water                                                  | Environmental | 1   | 5373548 | 5508 | 10 | 1 | 119 |
| GCF_015643545.1        | Complete Genome | bulk soil of maize                                     | Environmental | 1   | 5147837 | 5219 | 39 | 1 | 112 |
| GCF_015880925.1        | Contig          | maybe soil                                             | Environmental | 42  | 5509502 | 5665 | 16 | 1 | 92  |
| GCF_016892545.1        | Contig          | Grass field Lolium arundinaceum                        | Plant         | 113 | 5749343 | 5905 | 5  | 1 | 85  |
| GCF_017086525.1        | Complete Genome | Not Given                                              | Not Given     | 8   | 5747602 | 5853 | 41 | 1 | 122 |
| GCF_017086545.1        | Complete Genome | Homo sapiens                                           | Human         | 21  | 5608820 | 5629 | 45 | 1 | 147 |
| GCF_017086565.1        | Complete Genome | Homo sapiens                                           | Human         | 14  | 5999955 | 6050 | 46 | 1 | 139 |
| GCF_017352315.1        | Complete Genome | Hypersaline environment                                | Environmental | 19  | 6412227 | 6581 | 47 | 1 | 147 |
| GCF_017798265.1        | Complete Genome | mulberry                                               | Plant         | 4   | 5268816 | 5324 | 42 | 1 | 130 |
| GCF_018101235.1        | Contig          | roots Brassica napus                                   | Plant         | 97  | 5991912 | 6140 | 16 | 1 | 108 |
| GCF_018615005.1        | Scaffold        | soil                                                   | Environmental | 77  | 5646934 | 5888 | 7  | 0 | 60  |
| GCF_018615055.1        | Scaffold        | soil                                                   | Environmental | 71  | 6068635 | 6293 | 9  | 1 | 77  |
| GCF_019037025.1        | Scaffold        | cleanroom floor                                        | Environmental | 52  | 5855780 | 5975 | 6  | 1 | 48  |
| GCF_019037625.1        | Scaffold        | cleanroom floor                                        | Environmental | 67  | 6163057 | 6319 | 5  | 1 | 48  |
| GCF_019038045.1        | Scaffold        | cleanroom floor                                        | Environmental | 69  | 5616472 | 5748 | 5  | 1 | 47  |
| GCF_019193015.1        | Contig          | Poa pratensis L.                                       | Plant         | 141 | 6167380 | 6245 | 15 | 1 | 122 |
| GCF_019281975.1        | Scaffold        | Homo sapiens                                           | Human         | 176 | 6169273 | 6269 | 10 | 1 | 78  |
| GCA_019641605.1        | Contig          | farm soil                                              | Environmental | 61  | 5269082 | 5358 | 14 | 1 | 88  |
| GCF_019748595.1        | Contig          | Air filter debris                                      | Environmental | 98  | 5930230 | 6068 | 8  | 1 | 111 |
| GCA_020176875.1        | Contig          | roots coffee                                           | Plant         | 10  | 5234742 | 5249 | 46 | 1 | 152 |
| <b>GCF_020179075.1</b> | Contig          | rizosphere wheat                                       | Plant         | 34  | 5271792 | 5389 | 17 | 1 | 119 |
| GCF_020251185.1        | Contig          | Soil                                                   | Environmental | 67  | 6004406 | 6179 | 9  | 1 | 72  |
| GCF_900113355.1        | Scaffold        | Not Given                                              | Not Given     | 81  | 5886428 | 6043 | 9  | 1 | 77  |
| GCF_900445445.1        | Contig          | environmental                                          | Environmental | 4   | 5364371 | 5388 | 39 | 1 | 131 |
| GCF_900445485.1        | Contig          | Not Given                                              | Not Given     | 8   | 5782255 | 5919 | 41 | 1 | 122 |

Table S7. Comparison of the assembly level, source, number of contigs, length, number of CDS, number of rRNA and number of tRNA from different genomes of *Priestia aryabhattai* in NCBI (<https://www.ncbi.nlm.nih.gov/datasets/genomes/?taxon=412384>).

| Assembly Accession | Assembly Level  | Source (NCBI)               | Source Given   | Contig | Length  | CDS  | rRNA | tmRNA | tRNA |
|--------------------|-----------------|-----------------------------|----------------|--------|---------|------|------|-------|------|
| This study         | Scaffold        | Nile Tilapia                | Aquatic Animal | 42     | 5337734 | 5443 | 27   | 1     | 124  |
| GCF_000785045.1    | Contig          | deep-sea water              | Environment    | 37     | 5105129 | 5212 | 6    | 1     | 79   |
| GCF_000956595.1    | Contig          | high-altitude air sample    | Environment    | 72     | 5095483 | 5210 | 5    | 1     | 78   |
| GCF_001038965.1    | Contig          | Plant                       | Plant          | 48     | 5421362 | 5628 | 12   | 1     | 111  |
| GCF_001043825.1    | Contig          | Plant                       | Plant          | 109    | 5499219 | 5683 | 11   | 1     | 117  |
| GCF_001619595.1    | Contig          | Ulu Slim Hot Spring         | Environment    | 37     | 4963060 | 5092 | 9    | 1     | 86   |
| GCF_001858395.1    | Scaffold        | Rhizospheric soil           | Environment    | 23     | 5403026 | 5487 | 11   | 1     | 118  |
| GCF_002167185.1    | Contig          | lake sediment               | Environment    | 352    | 4599278 | 4654 | 13   | 1     | 110  |
| GCF_002208605.1    | Contig          | date palm                   | Plant          | 118    | 5584517 | 5690 | 5    | 1     | 73   |
| GCF_002265635.1    | Contig          | Domestic sewerage soil      | Environment    | 72     | 4193880 | 4265 | 10   | 1     | 82   |
| GCF_002555815.1    | Scaffold        | root                        | Plant          | 83     | 5300455 | 5457 | 2    | 1     | 78   |
| GCF_002569015.1    | Scaffold        | Wheat                       | Plant          | 87     | 5410757 | 5552 | 5    | 1     | 88   |
| GCF_002569785.1    | Scaffold        | soil                        | Environment    | 53     | 5100887 | 5218 | 2    | 1     | 72   |
| GCF_002588685.1    | Scaffold        | soil                        | Environment    | 300    | 5381867 | 5438 | 4    | 1     | 89   |
| GCF_002688605.1    | Complete Genome | enriched culture of compost | Environment    | 3      | 5254250 | 5310 | 42   | 1     | 130  |
| GCF_013372535.1    | Contig          | soil                        | Environment    | 34     | 5172894 | 5236 | 13   | 1     | 80   |
| GCF_014138775.1    | Scaffold        | Not Given                   | Not Given      | 48     | 6054250 | 6212 | 10   | 1     | 80   |
| GCF_014932885.1    | Scaffold        | clay soil                   | Environment    | 82     | 6169737 | 6336 | 5    | 1     | 54   |
| GCF_015845475.1    | Contig          | Not Given                   | Not Given      | 35     | 5497028 | 5592 | 22   | 1     | 131  |
| GCF_017743055.1    | Complete Genome | soil                        | Environment    | 6      | 5956834 | 6039 | 43   | 1     | 142  |
| GCF_018881345.1    | Contig          | tobacco seed                | Plant          | 6      | 5815073 | 5848 | 43   | 1     | 137  |
| GCF_019748635.1    | Contig          | Air filter                  | Environment    | 87     | 5462892 | 5602 | 11   | 1     | 119  |
| GCF_019748735.1    | Contig          | Air filter                  | Environment    | 62     | 5354727 | 5491 | 6    | 1     | 113  |
| GCF_019748795.1    | Contig          | Air filter                  | Environment    | 33     | 5509225 | 5591 | 9    | 1     | 96   |
| GCF_019748815.1    | Contig          | Air filter                  | Environment    | 46     | 5210447 | 5278 | 8    | 1     | 100  |
| GCF_019748835.1    | Contig          | Air filter                  | Environment    | 54     | 5127833 | 5215 | 7    | 1     | 99   |
| GCF_019748845.1    | Contig          | Air filter                  | Environment    | 47     | 5100431 | 5184 | 6    | 1     | 96   |

|                 |                 |                               |                |     |         |      |    |   |     |
|-----------------|-----------------|-------------------------------|----------------|-----|---------|------|----|---|-----|
| GCF_019748955.1 | Contig          | Air filter                    | Environment    | 38  | 5177591 | 5286 | 5  | 1 | 87  |
| GCF_019748975.1 | Contig          | Air filter                    | Environment    | 53  | 5104184 | 5182 | 5  | 1 | 100 |
| GCF_019748995.1 | Contig          | Air filter                    | Environment    | 36  | 5156817 | 5222 | 9  | 1 | 91  |
| GCA_019749195.1 | Contig          | HEPA air filter (JPL lab)     | Environment    | 119 | 6016092 | 6135 | 11 | 1 | 118 |
| GCF_019749215.1 | Contig          | HEPA air filter (JPL lab)     | Environment    | 76  | 5662423 | 5761 | 9  | 1 | 102 |
| GCA_019749225.1 | Contig          | HEPA air filter (JPL lab)     | Environment    | 99  | 6011509 | 6137 | 14 | 1 | 111 |
| GCF_019968665.1 | Complete Genome | mangrove sediment             | Environment    | 4   | 5257678 | 5271 | 42 | 1 | 130 |
| GCF_020102825.1 | Scaffold        | Microcosmus                   | Aquatic Animal | 33  | 5640273 | 5684 | 9  | 1 | 81  |
| GCF_020171825.1 | Contig          | Mangrove rhizosphere sediment | Environment    | 22  | 5144759 | 5241 | 12 | 1 | 107 |
| GCF_020524445.1 | Contig          | Mangrove rhizosphere sediment | Environment    | 51  | 5425686 | 5596 | 14 | 1 | 112 |
| GCF_020524855.1 | Contig          | Mangrove rhizosphere sediment | Environment    | 32  | 5158491 | 5248 | 13 | 1 | 96  |
| GCF_903971025.1 | Contig          | Pterocarpus santalinus leaf   | Plant          | 160 | 5632564 | 5830 | 30 | 1 | 129 |
| GCF_903971035.1 | Contig          | Pterocarpus santalinus leaf   | Plant          | 120 | 5475026 | 5711 | 28 | 1 | 99  |
